# Supplementary material for: Catalysis of dinitrogen activation and reduction by a single Fe13 cluster and its doped systems
Source: Royal Society of Chemistry journal article supplement (doi:10.1039/d2cp04619a), 2022-12-05
Supplement: d2cp04619a1.pdf [file d2cp04619a1.pdf]

*Supporting Information for*

## **Catalysis for dinitrogen activation and reduction by a single cluster Fe<sub>13</sub> and its doping systems**

Ran Cheng,<sup>ab</sup> Chaonan Cui <sup>\*a</sup> and Zhixun Luo <sup>\*ab</sup>

<sup>a</sup> State Key Laboratory for Structural Chemistry of Unstable and Stable Species, Institute of Chemistry, Chinese Academy of Sciences, Beijing 100190, P. R. China.

<sup>b</sup> University of Chinese Academy of Sciences, Beijing 100049, P. R. China.

E-mail: [chncui@iccas.ac.cn](mailto:chncui@iccas.ac.cn), [zxluo@iccas.ac.cn](mailto:zxluo@iccas.ac.cn)

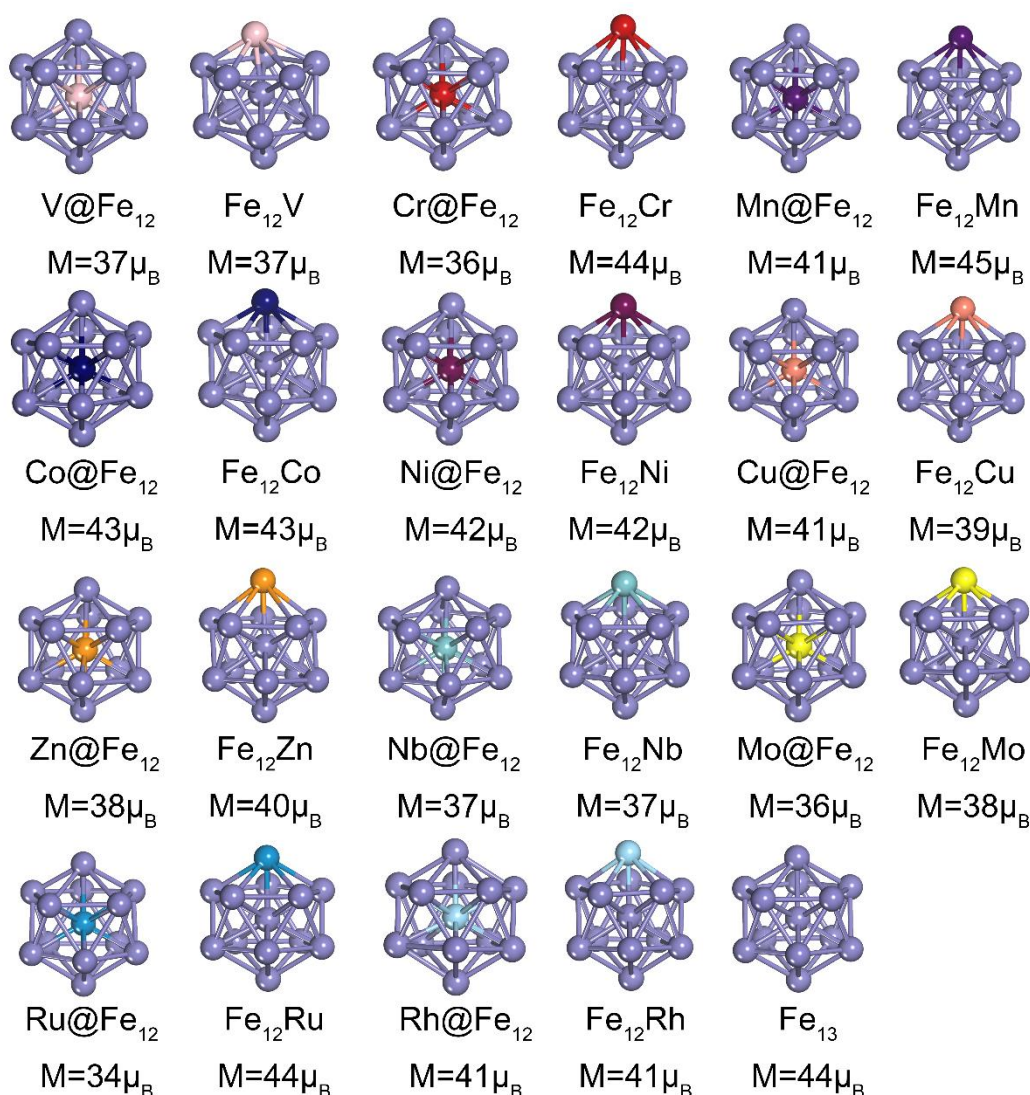

**Fig. S1** The optimized geometrical structures of doped  $Fe_{13}$  clusters.

Based on the manual of VASP, section 6.13, "If one is searching for a spin polarized (magnetic or antiferromagnetic) solution, it is usually safest to start from larger local magnetic moments, because in some cases, the default values might not be sufficiently big. A safe default is usually the experimental magnetic moment multiplied by 1.2 or 1.5.", therefore, we have compared the energies of five typical clusters by setting with three different magnetic moments (Table S1), and found that the values of magnetic moments for Fe and other doped atoms are reasonable to be set with 5.0 and element-dependent values, respectively.

**Table S1** The energies and magnetic moment of selected five clusters with different MAGMOM settings.

| Clusters            | In the work |                        |                 | MAGMOM=1.0 |                 | MAGMOM=20.0 |                 |
|---------------------|-------------|------------------------|-----------------|------------|-----------------|-------------|-----------------|
|                     | Energy      | MAGMOM set in the work | Magnetic Moment | Energy     | Magnetic Moment | Energy      | Magnetic Moment |
| Fe <sub>13</sub>    | -86.64 eV   | Fe:5.0                 | 44 $\mu_B$      | -86.11 eV  | 36 $\mu_B$      | -86.64 eV   | 44 $\mu_B$      |
| Fe <sub>12</sub> Nb | -87.69 eV   | Fe:5, Nb:7.0           | 37 $\mu_B$      | -87.32 eV  | 29 $\mu_B$      | -87.69 eV   | 37 $\mu_B$      |
| Nb@Fe <sub>12</sub> | -87.34 eV   | Fe:5, Nb:7.0           | 37 $\mu_B$      | -87.34 eV  | 37 $\mu_B$      | -87.34 eV   | 37 $\mu_B$      |
| Fe <sub>12</sub> Rh | -85.61 eV   | Fe:5.0, Rh:4.0         | 41 $\mu_B$      | -85.31 eV  | 33 $\mu_B$      | -85.70 eV   | 41 $\mu_B$      |
| Rh@Fe <sub>12</sub> | -83.95 eV   | Fe:5.0, Rh:4.0         | 41 $\mu_B$      | -83.56 eV  | 35 $\mu_B$      | -83.95 eV   | 41 $\mu_B$      |

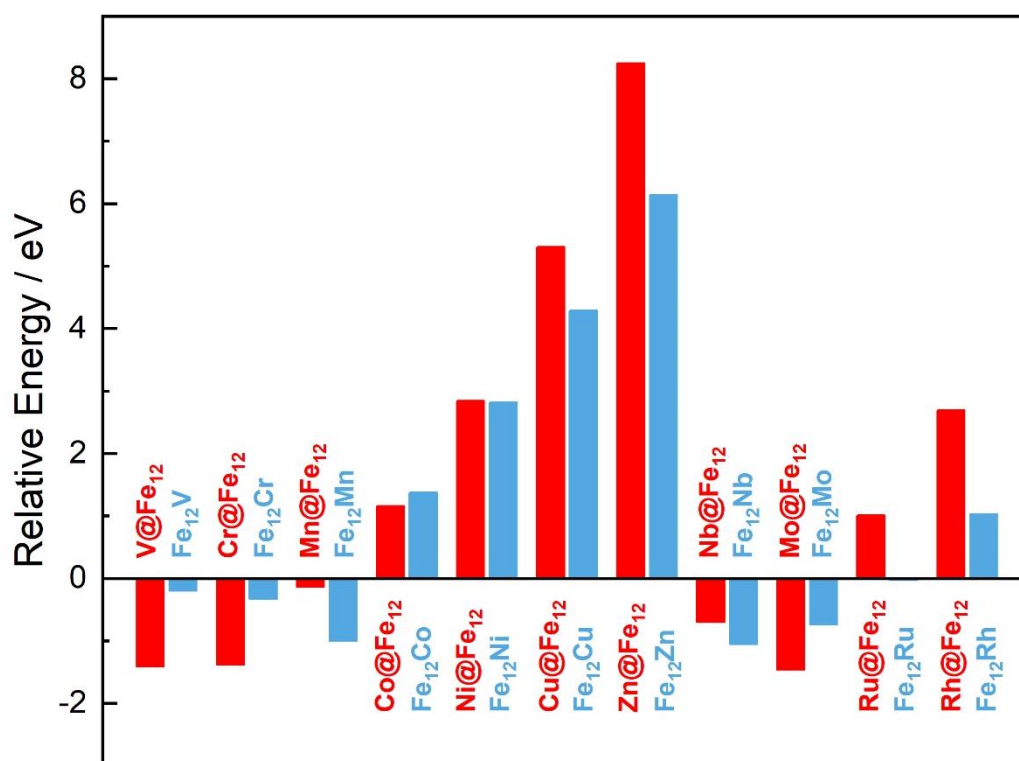

**Fig. S2** The relative energy of doped clusters compared to pure Fe<sub>13</sub> clusters, in which the negative values indicate that the doped clusters are more stable than Fe<sub>13</sub>. The relative energy is evaluated according to the equation:  $\Delta E = E(\text{Fe}_{12}\text{X}) - E(\text{Fe}_{13})$ , where  $E(\text{Fe}_{12}\text{X})$  and  $E(\text{Fe}_{13})$  present the energy of Fe<sub>12</sub>X and Fe<sub>13</sub> clusters, respectively.

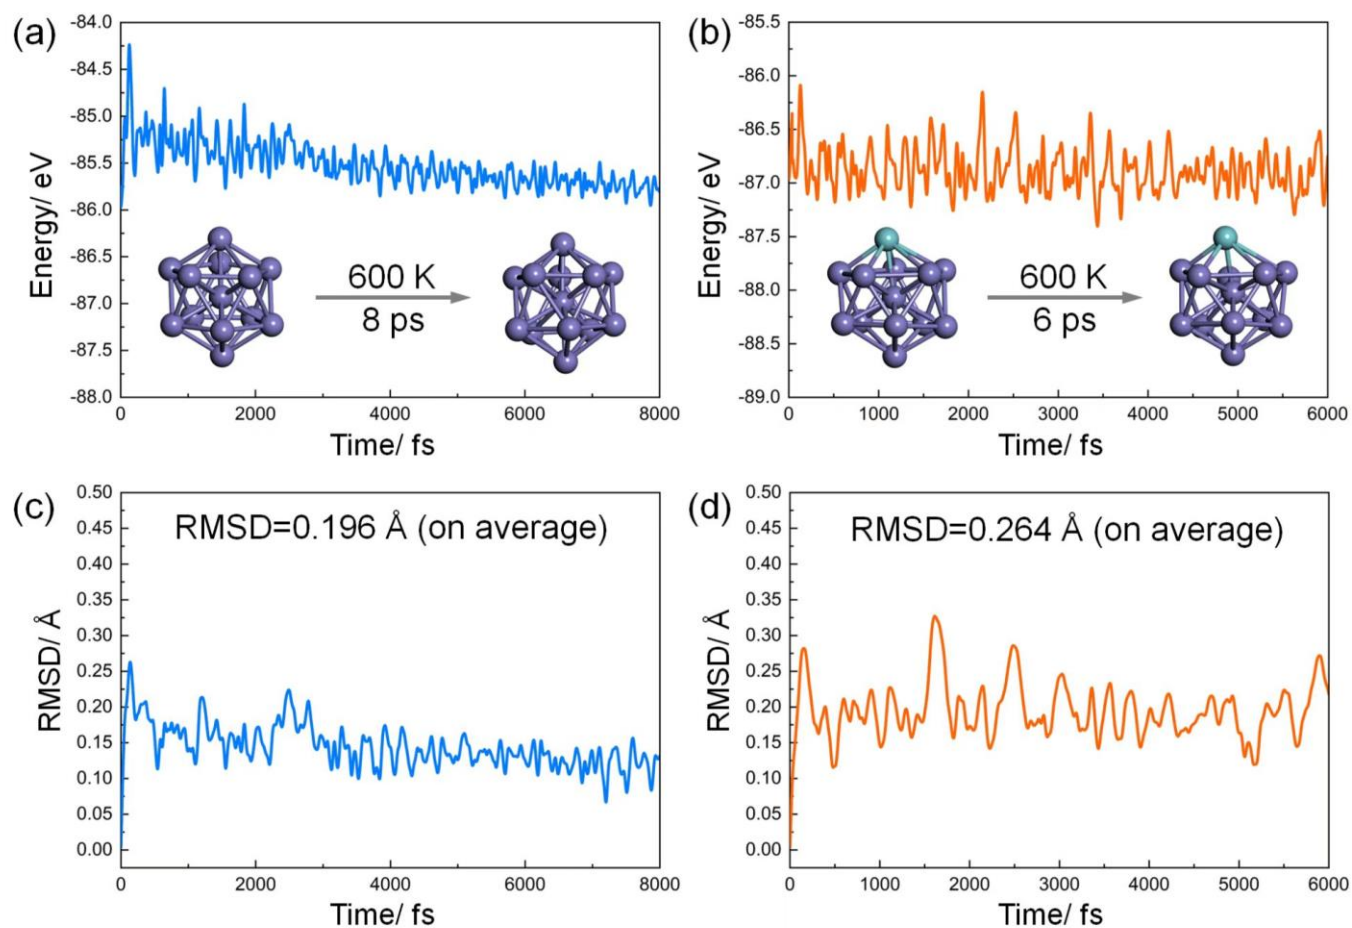

**Fig. S3** The energy variations and the root mean square deviation (RMSD) of Fe-Fe and Fe-Nb bond lengths during the AIMD simulations for (a/c) Fe<sub>13</sub> and (b/d) Fe<sub>12</sub>Nb at 600 K (the initial and final structures are shown as insets), respectively. The running time is 8ps and 6 ps respectively, with a time step of 1 fs.

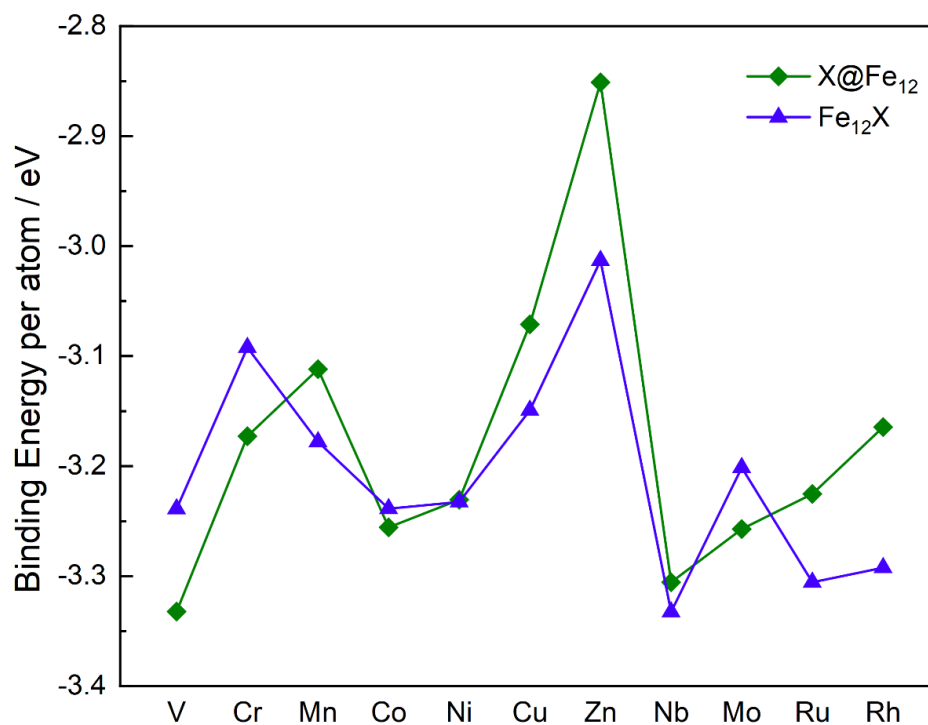

**Fig. S4** The average binding energy per atom ( $E_{ab}$ ) of doped  $Fe_{13}$  clusters.

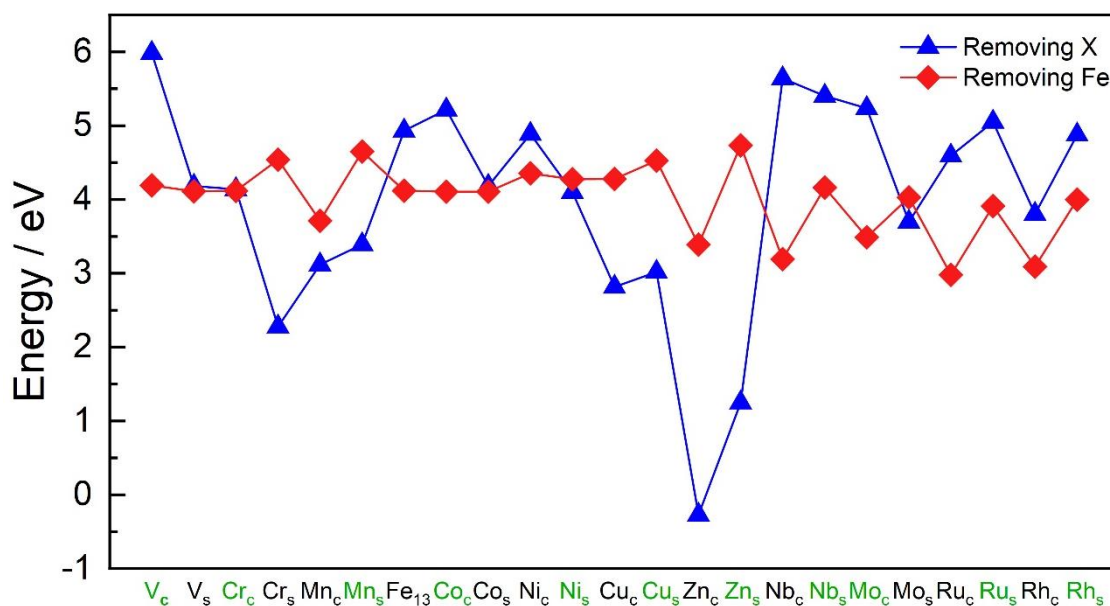

**Fig. S5** The energies of removing X or Fe atom of doped  $Fe_{13}$  clusters. The “c” and “s” represent the center- and shell- doped clusters, respectively. The green tick labels present the energy favourable structures.

**Table S2** The bond length (in Å) between the center-doped atom X and the surrounding Fe atom in X@Fe<sub>12</sub> systems.

| Doping atom | V    | Cr   | Mn   | Co   | Ni   | Cu   | Zn   | Nb   | Mo   | Ru   | Rh   |
|-------------|------|------|------|------|------|------|------|------|------|------|------|
| Fe1         | 2.44 | 2.40 | 2.48 | 2.46 | 2.38 | 2.40 | 2.41 | 2.51 | 2.48 | 2.42 | 2.50 |
| Fe2         | 2.44 | 2.40 | 2.48 | 2.37 | 2.38 | 2.40 | 2.44 | 2.51 | 2.48 | 2.45 | 2.50 |
| Fe3         | 2.35 | 2.38 | 2.34 | 2.38 | 2.38 | 2.39 | 2.39 | 2.44 | 2.39 | 2.43 | 2.41 |
| Fe4         | 2.35 | 2.35 | 2.34 | 2.36 | 2.38 | 2.38 | 2.37 | 2.44 | 2.45 | 2.40 | 2.41 |
| Fe5         | 2.35 | 2.40 | 2.38 | 2.40 | 2.38 | 2.39 | 2.39 | 2.44 | 2.40 | 2.41 | 2.41 |
| Fe6         | 2.44 | 2.35 | 2.33 | 2.36 | 2.38 | 2.38 | 2.36 | 2.51 | 2.49 | 2.40 | 2.48 |
| Fe7         | 2.44 | 2.40 | 2.48 | 2.46 | 2.38 | 2.40 | 2.41 | 2.51 | 2.48 | 2.45 | 2.50 |
| Fe8         | 2.34 | 2.39 | 2.38 | 2.40 | 2.38 | 2.39 | 2.39 | 2.44 | 2.40 | 2.43 | 2.41 |
| Fe9         | 2.35 | 2.55 | 2.34 | 2.36 | 2.38 | 2.38 | 2.37 | 2.44 | 2.45 | 2.40 | 2.42 |
| Fe10        | 2.35 | 2.38 | 2.34 | 2.38 | 2.38 | 2.39 | 2.39 | 2.44 | 2.39 | 2.41 | 2.42 |
| Fe11        | 2.44 | 2.40 | 2.48 | 2.37 | 2.38 | 2.40 | 2.44 | 2.51 | 2.48 | 2.42 | 2.50 |
| Fe12        | 2.44 | 2.35 | 2.33 | 2.37 | 2.38 | 2.38 | 2.36 | 2.51 | 2.49 | 2.40 | 2.48 |

**Table S3** The bond length (in Å) between the shell-doped X and the surrounding Fe atom in the doped Fe<sub>12</sub>X systems.

| Doping atom | V    | Cr   | Mn   | Co   | Ni   | Cu   | Zn   | Nb   | Mo   | Ru   | Rh   |
|-------------|------|------|------|------|------|------|------|------|------|------|------|
| Fe1         | 2.36 | 2.67 | 2.64 | 2.35 | 2.41 | 2.60 | 2.64 | 2.48 | 2.40 | 2.48 | 2.57 |
| Fe2         | 2.36 | 2.67 | 2.64 | 2.35 | 2.42 | 2.60 | 2.61 | 2.48 | 2.40 | 2.49 | 2.56 |
| Fe3         | 2.56 | 2.71 | 2.64 | 2.60 | 2.62 | 2.63 | 2.61 | 2.61 | 2.63 | 2.65 | 2.56 |
| Fe4         | 2.83 | 2.69 | 2.64 | 2.74 | 2.79 | 2.62 | 2.68 | 2.83 | 2.83 | 2.63 | 2.64 |
| Fe5         | 2.53 | 2.72 | 2.64 | 2.58 | 2.57 | 2.63 | 2.81 | 2.60 | 2.60 | 2.64 | 2.57 |

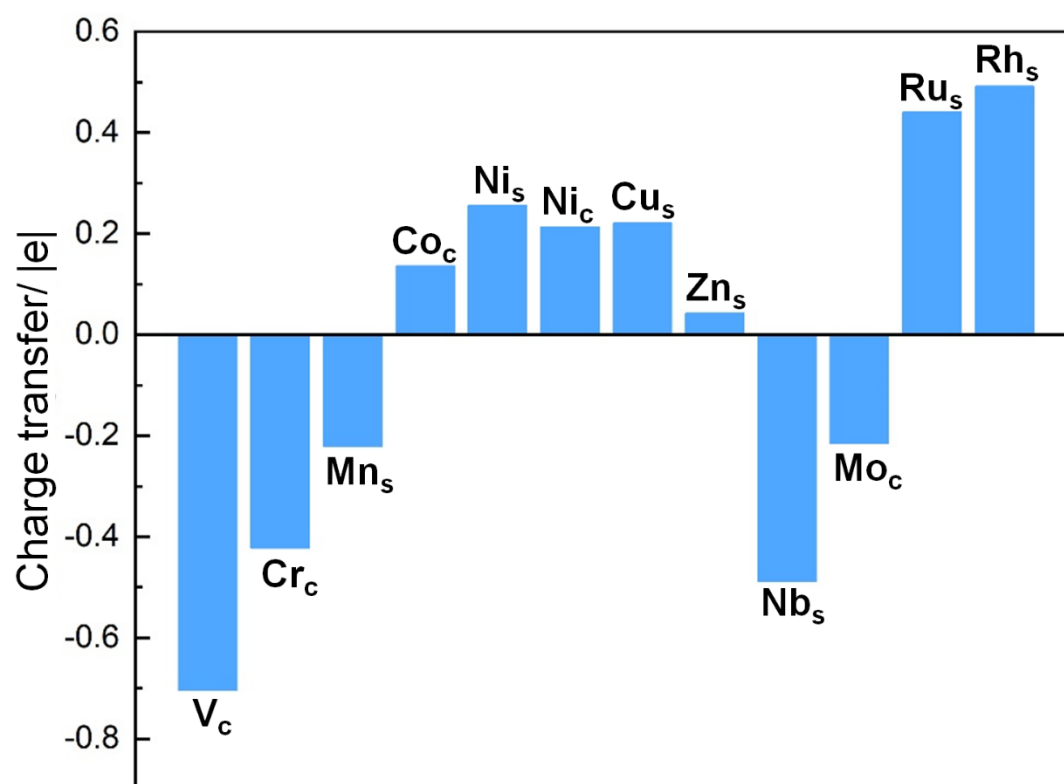**Fig. S6** The values of Bader charge population on the doped atom. “c” and “s” represent the center- and shell- doped clusters, respectively.

**Table S4** The optimized geometrical structures and the transition states of the N<sub>2</sub> adsorbed on doped Fe<sub>13</sub> clusters.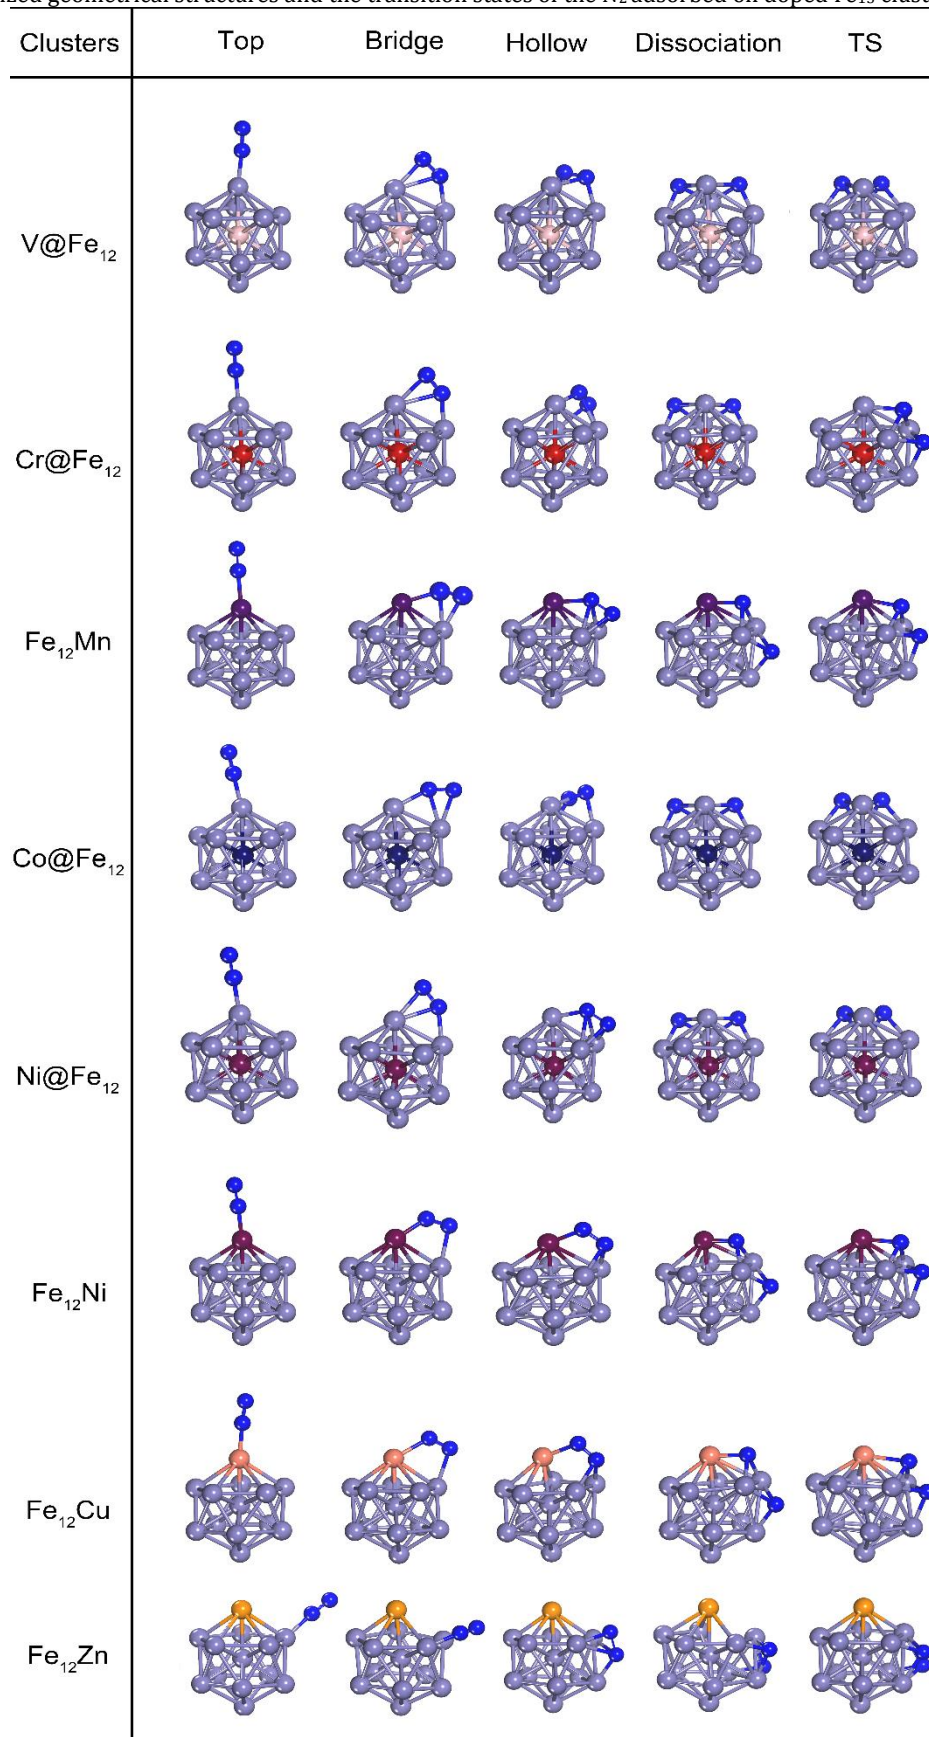



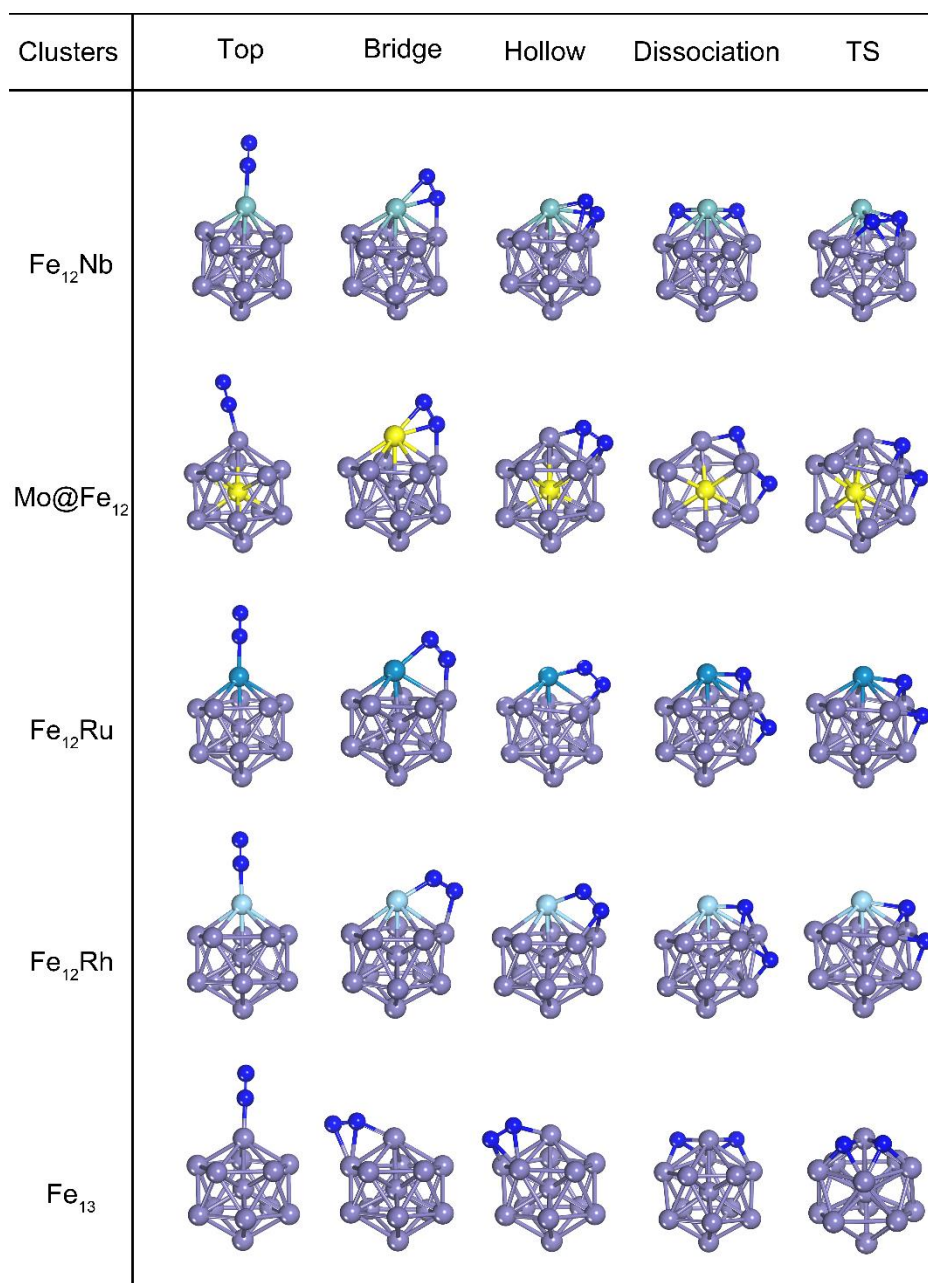

**Table S5** The activation energy barriers ( $\Delta E_a$ / eV) of  $N_2$  dissociation on  $Fe_{13}$  and the doped clusters.

| Cluster      | V@Fe <sub>12</sub>  | Cr@Fe <sub>12</sub> | Fe <sub>12</sub> Mn | Fe <sub>13</sub>    | Co@Fe <sub>12</sub> | Ni@Fe <sub>12</sub> | Fe <sub>12</sub> Ni |
|--------------|---------------------|---------------------|---------------------|---------------------|---------------------|---------------------|---------------------|
| $\Delta E_a$ | 1.07                | 1.18                | 0.99                | 0.77                | 0.79                | 0.93                | 1.10                |
| Cluster      | Fe <sub>12</sub> Cu | Fe <sub>12</sub> Zn | Fe <sub>12</sub> Nb | Mo@Fe <sub>12</sub> | Fe <sub>12</sub> Ru | Fe <sub>12</sub> Rh |                     |
| $\Delta E_a$ | 0.85                | 0.98                | 0.56                | 1.12                | 1.09                | 1.25                |                     |

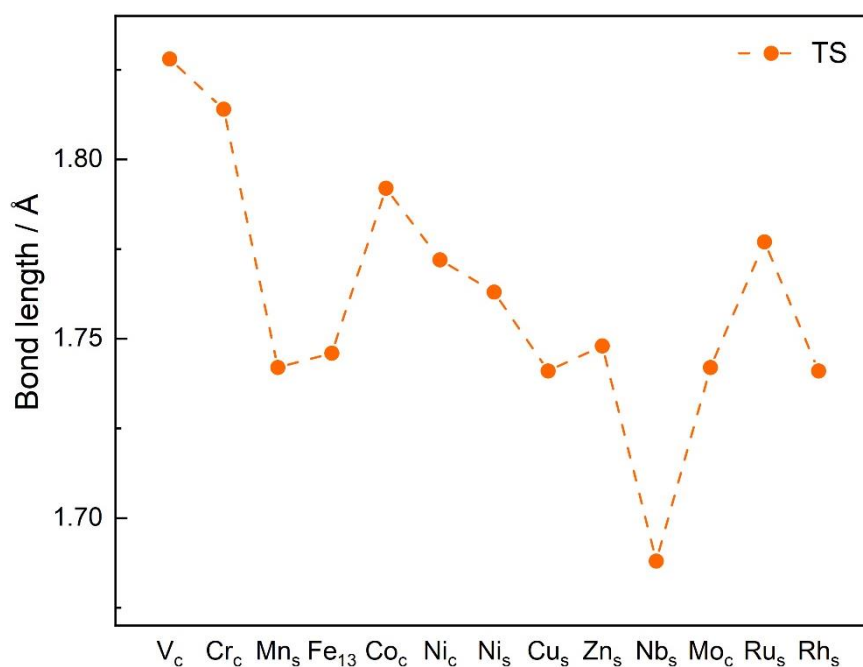**Fig. S7** The bond length of transition state where  $N_2$  dissociation occurs on the doped  $Fe_{13}$  clusters. "c" and "s" represent the center- and shell- doped clusters, respectively.

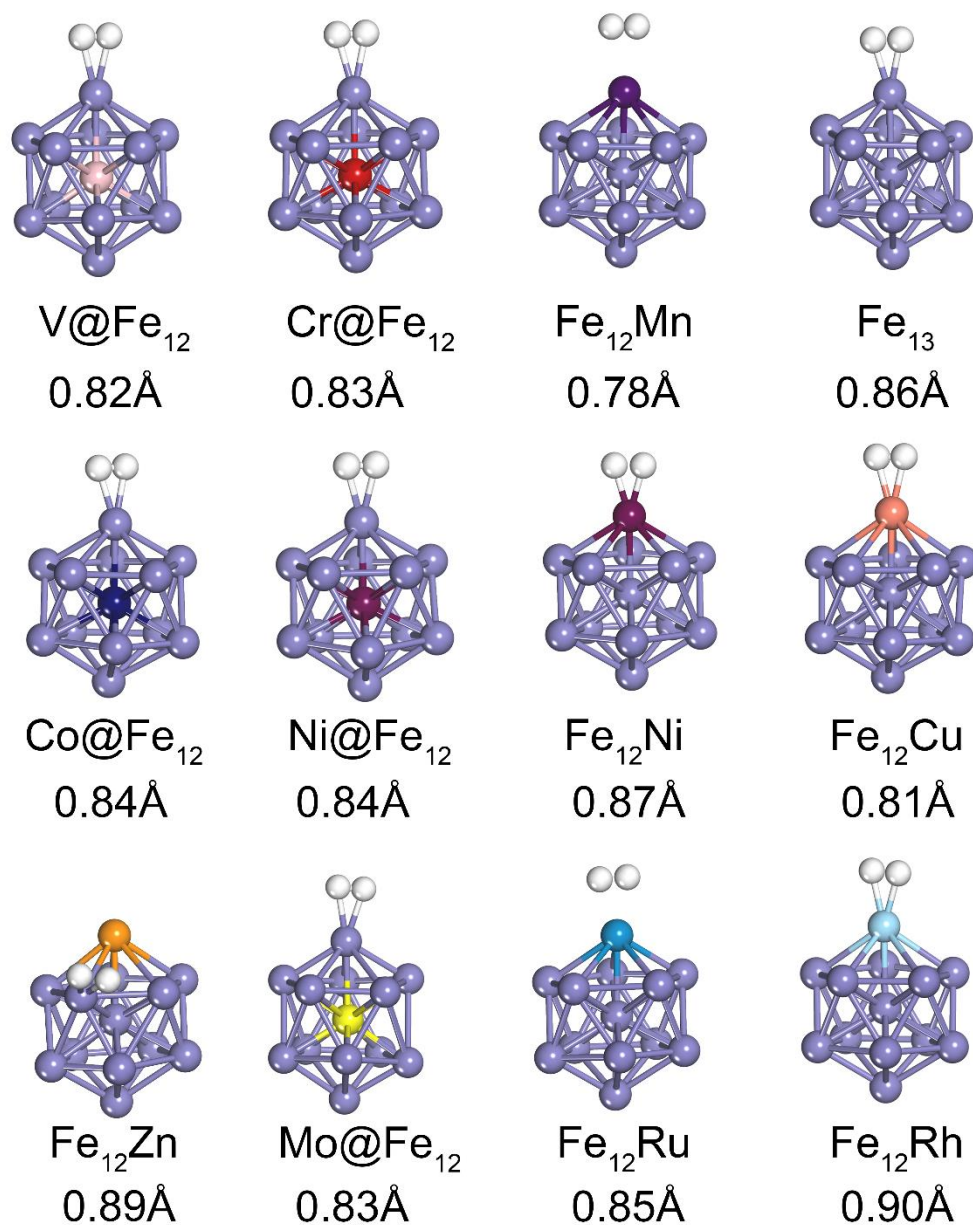

**Fig. S8** The optimized geometrical structures and the bond length of the H<sub>2</sub> adsorbed on Fe<sub>13</sub> and 12 doped Fe<sub>12</sub>X clusters.

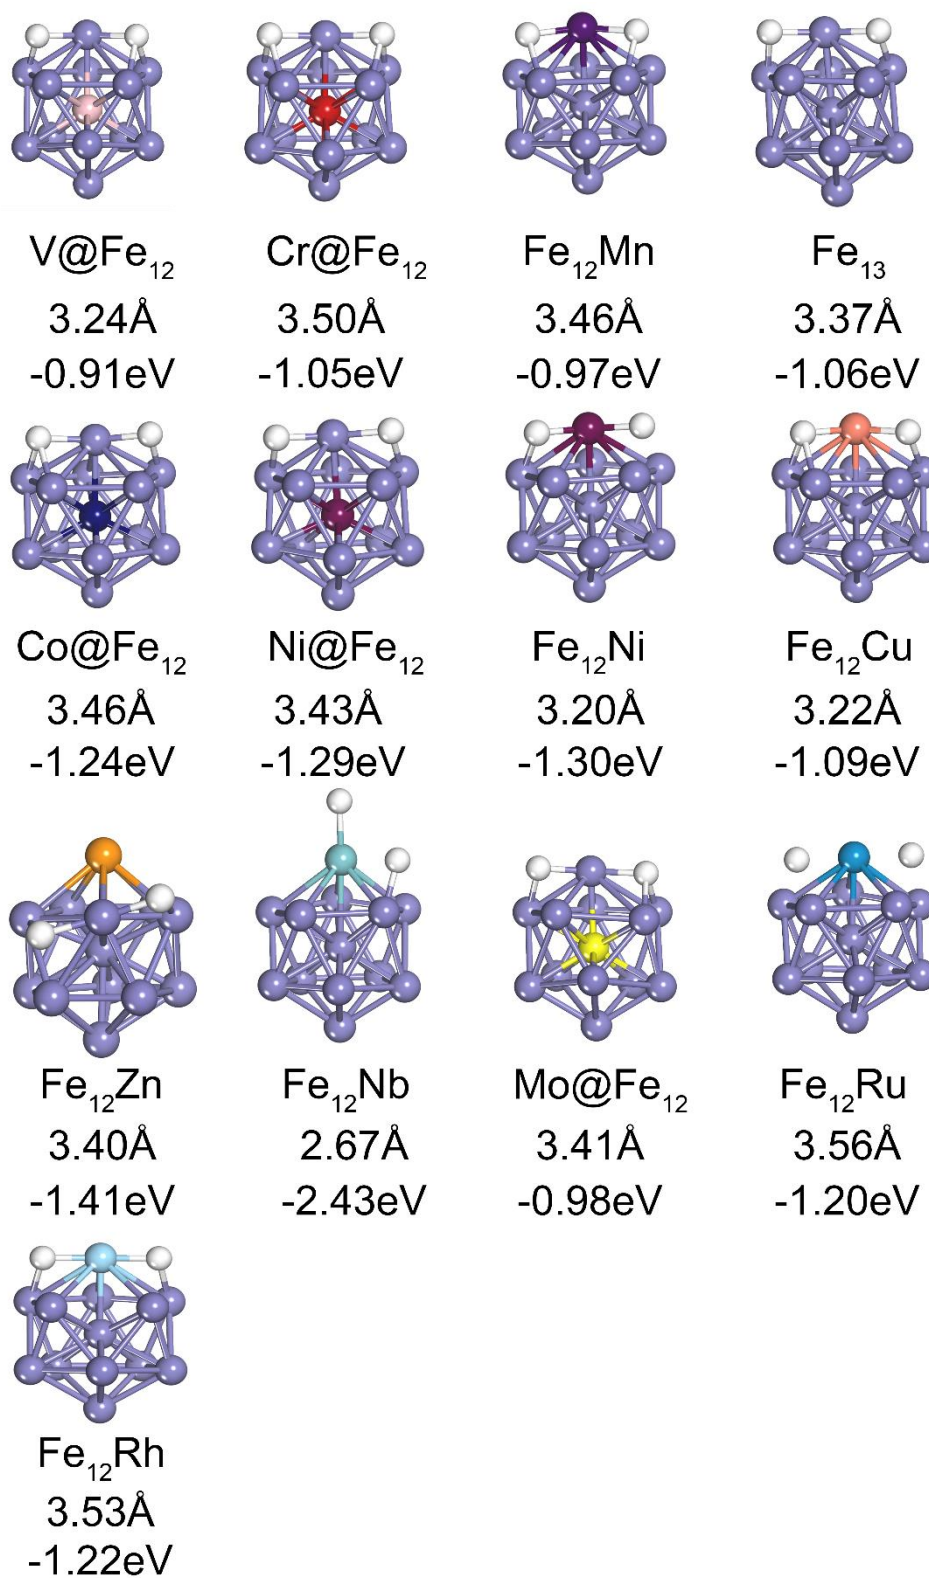

**Fig. S9** The optimized geometrical structures and the bond length of the dissociative adsorbed 2H\* on Fe<sub>13</sub> and 12 doped Fe<sub>12</sub>X clusters.

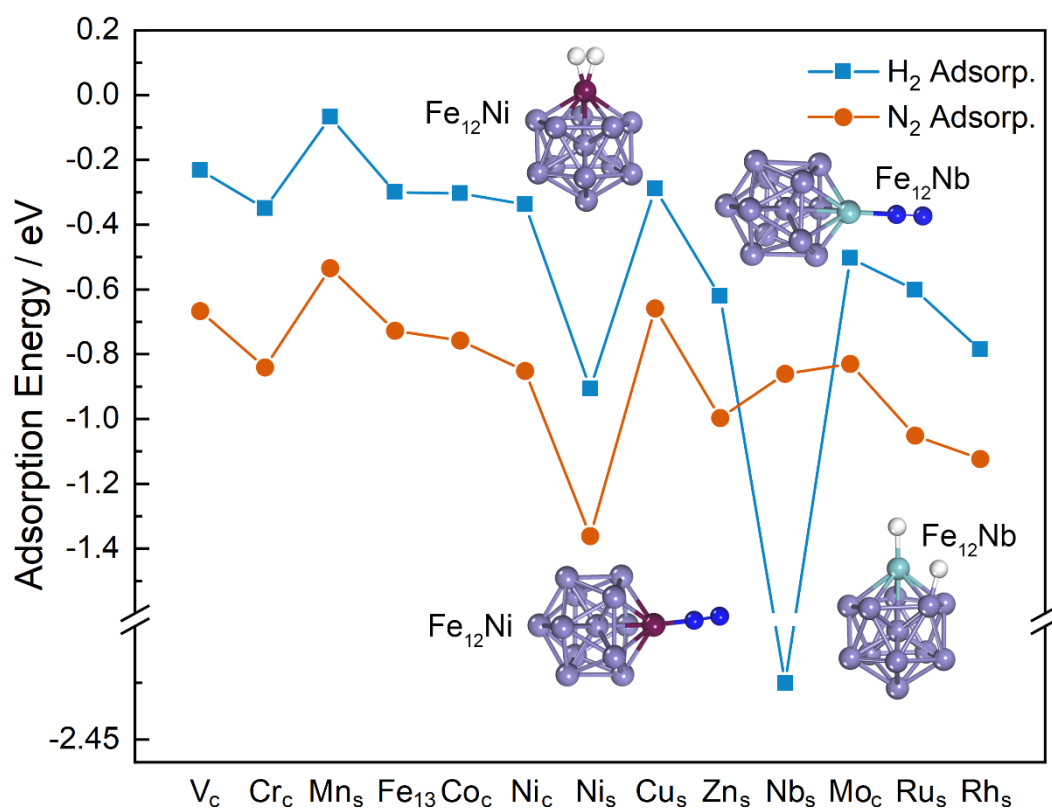

**Fig. S10** The adsorption energy of N<sub>2</sub> and H<sub>2</sub> on doped Fe<sub>13</sub> clusters. Spontaneous H-H dissociation only occur on the Fe<sub>12</sub>Nb cluster. The “c” and “s” represent the center- and shell- doped clusters, respectively.

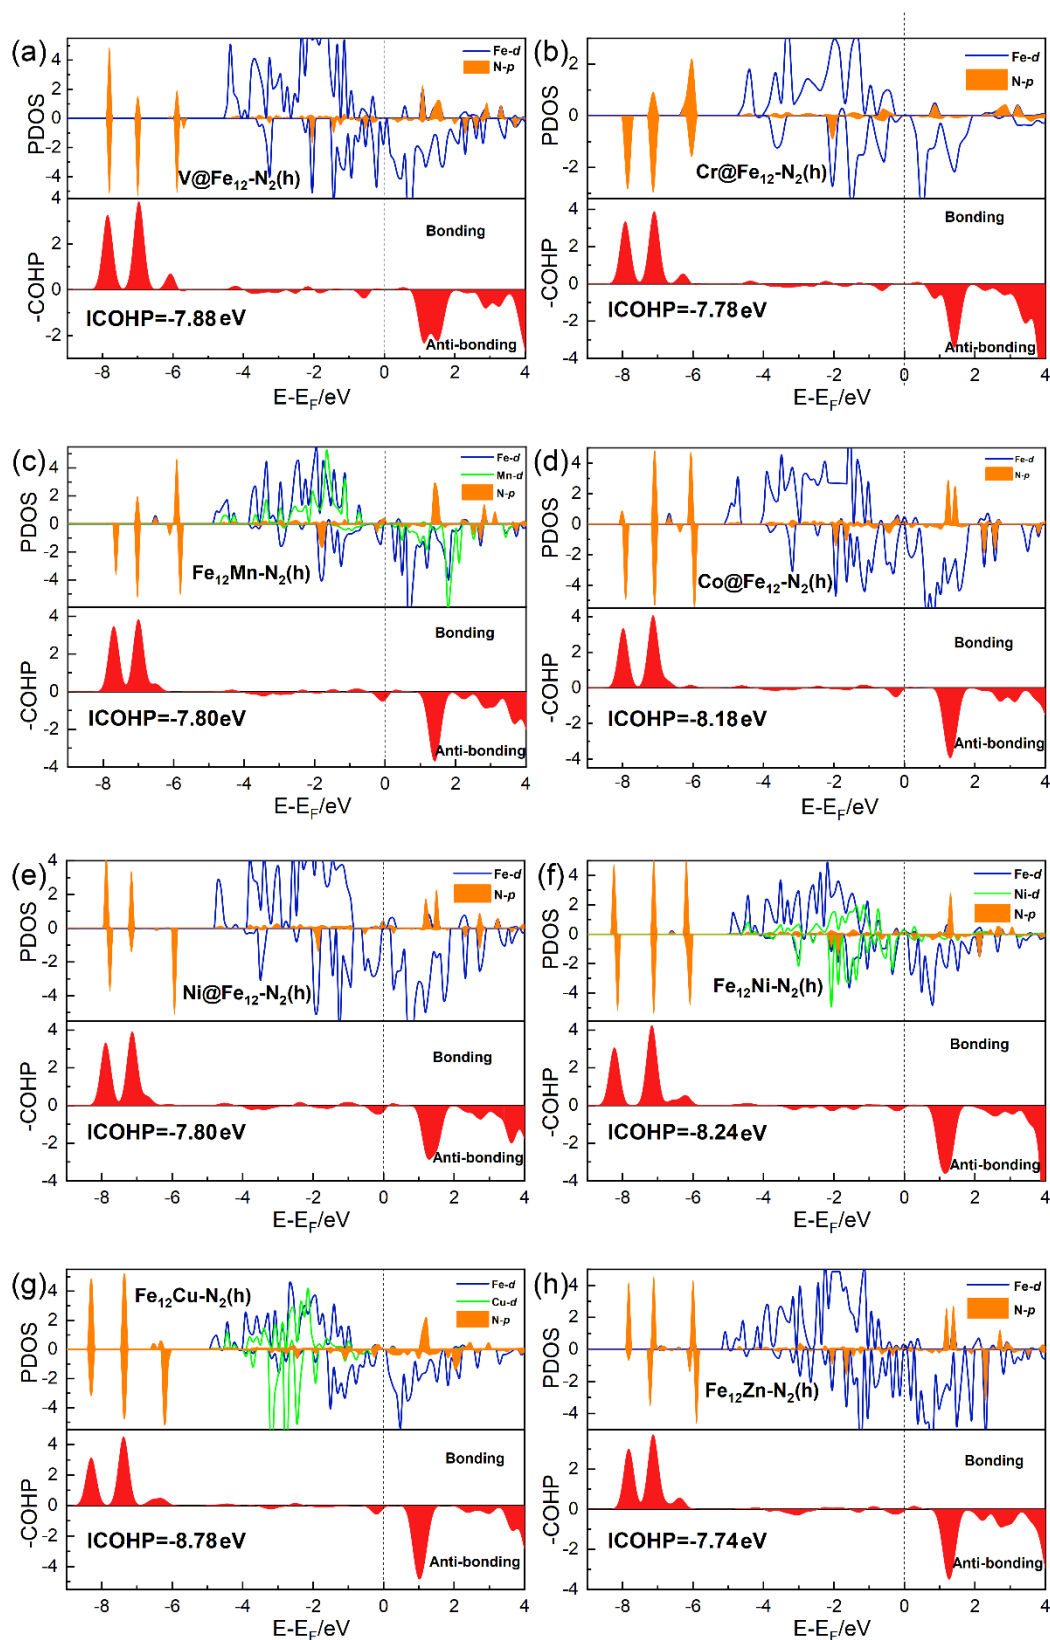

**Fig. S11** Calculated crystal orbital Hamilton population (COHP) and partial density of states (PDOS) for  $N_2$  adsorbed on the doped  $Fe_{13}$  clusters on hollow site.

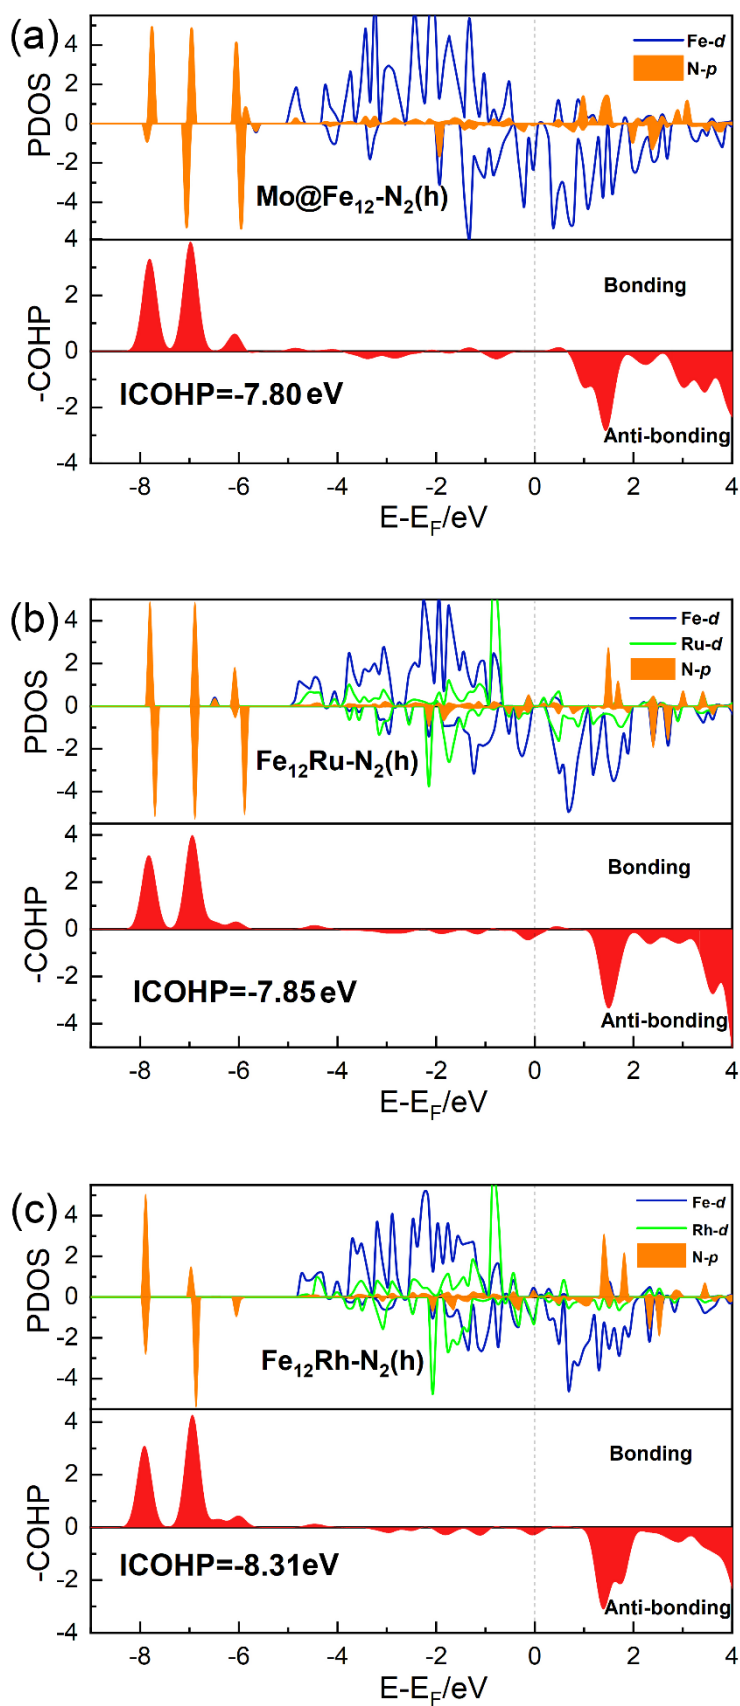

**Fig. S12** Calculated crystal orbital Hamilton population (COHP) and partial density of states (PDOS) for  $\text{N}_2$  adsorbed on the doped  $\text{Mo@Fe}_{12}$  (a),  $\text{Fe}_{12}\text{Ru}$  (b), and  $\text{Fe}_{12}\text{Rh}$  (c) clusters on the hollow site.

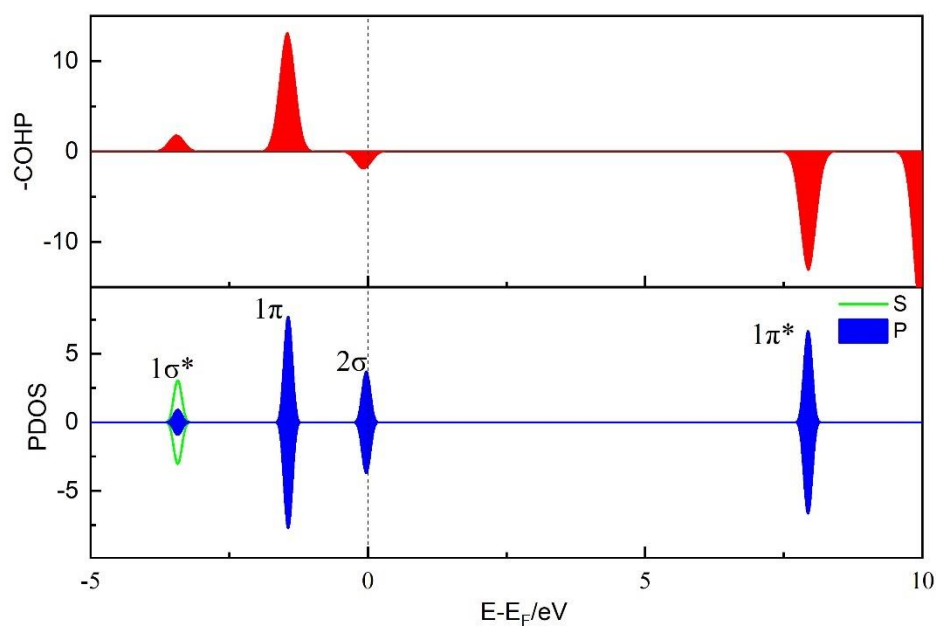

**Fig. S13** Calculated crystal orbital Hamilton population (COHP) and partial density of states (PDOS) for  $N_2$ .

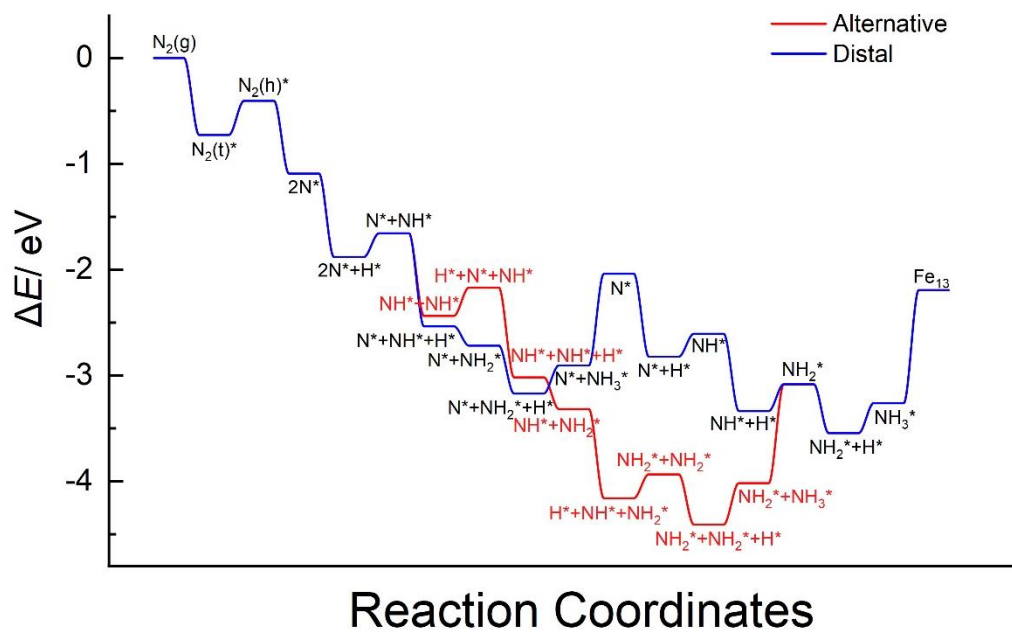

**Fig. S14** Free energy changes (in eV) for  $N_2$  activation and reduction to ammonia on  $Fe_{13}$  clusters.



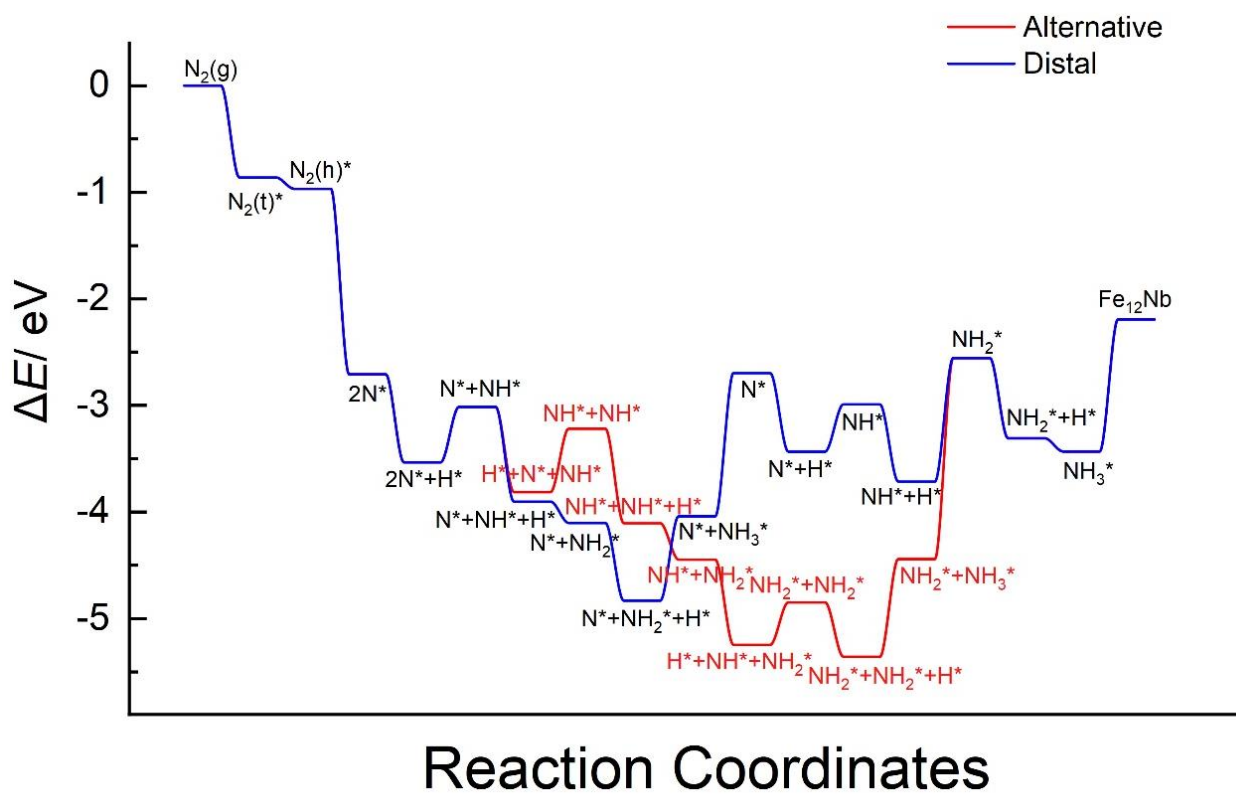

Fig. S15 Free energy changes (in eV) for  $N_2$  activation and reduction to ammonia on  $Fe_{12}Nb$  cluster.

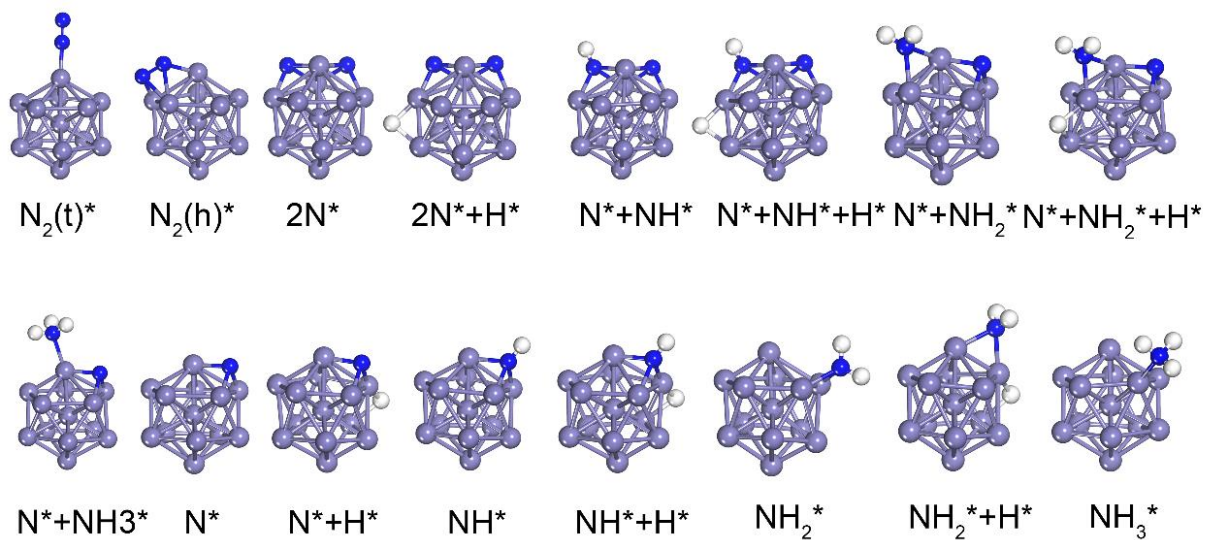

Fig. S16 The optimized structures of the intermediates in the hydrogenation process of  $N_2$  on the  $Fe_{13}$  clusters.

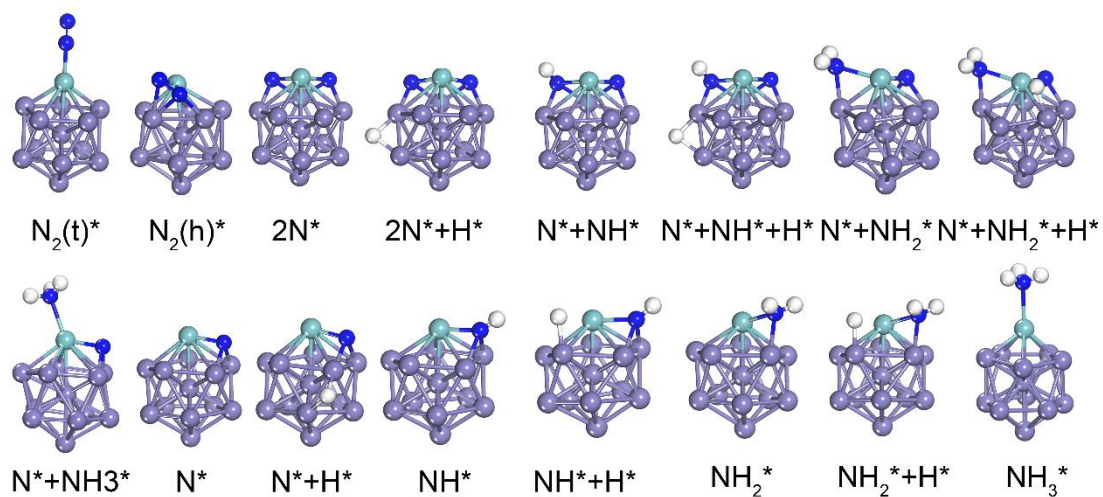

Fig. S17 The optimized structures of the intermediates in the hydrogenation process of  $N_2$  on the  $Fe_{12}Nb$  cluster

**Table S6** The XYZ coordinates and vibration frequencies of the intermediates in the hydrogenation process of the Fe<sub>13</sub> cluster.

| coordinates of N <sub>2</sub> (t)* |              |              |              | vibration frequencies of N <sub>2</sub> (t)* |                            |
|------------------------------------|--------------|--------------|--------------|----------------------------------------------|----------------------------|
|                                    |              |              |              | mode                                         | Frequency/cm <sup>-1</sup> |
| Fe                                 | 9.445400238  | 9.437000155  | 13.100199699 | 1                                            | 2117.95                    |
| Fe                                 | 11.446800232 | 7.907400131  | 12.430399656 | 2                                            | 323.94                     |
| Fe                                 | 12.747800350 | 9.005600214  | 10.640000105 | 3                                            | 312.73                     |
| Fe                                 | 11.624000072 | 11.228200197 | 10.266200304 | 4                                            | 280.51                     |
| Fe                                 | 9.584599733  | 11.497999430 | 11.715400219 | 5                                            | 46.20                      |
| Fe                                 | 11.682000160 | 10.254000425 | 12.690800428 | 6                                            | 36.20                      |
| Fe                                 | 11.262199879 | 9.339600205  | 8.614199758  |                                              |                            |
| Fe                                 | 11.132600307 | 7.297000289  | 9.962400198  |                                              |                            |
| Fe                                 | 9.117000103  | 7.547600269  | 11.464999914 |                                              |                            |
| Fe                                 | 7.982000113  | 9.753400087  | 11.071799994 |                                              |                            |
| Fe                                 | 9.286000133  | 10.883200169 | 9.288600087  |                                              |                            |
| Fe                                 | 9.042800069  | 8.513799906  | 9.103999734  |                                              |                            |
| Fe                                 | 10.382200480 | 9.406599998  | 10.880399942 |                                              |                            |
| N                                  | 12.913000584 | 11.219600439 | 13.687599897 |                                              |                            |
| N                                  | 13.652600050 | 11.807800531 | 14.323999882 |                                              |                            |

  

| coordinates of N <sub>2</sub> (h)* |              |              |              | vibration frequencies of N <sub>2</sub> (h)* |                            |
|------------------------------------|--------------|--------------|--------------|----------------------------------------------|----------------------------|
|                                    |              |              |              | mode                                         | frequency/cm <sup>-1</sup> |
| Fe                                 | 9.544399977  | 9.553599954  | 13.127399683 | 1                                            | 1471.35                    |
| Fe                                 | 11.368399858 | 7.904199958  | 12.404199839 | 2                                            | 368.91                     |
| Fe                                 | 12.739399672 | 9.051200151  | 10.666799545 | 3                                            | 329.13                     |
| Fe                                 | 11.658600569 | 11.329799891 | 10.370800495 | 4                                            | 231.01                     |
| Fe                                 | 9.528399706  | 11.564600468 | 11.771800518 | 5                                            | 158.37                     |
| Fe                                 | 11.875599623 | 10.381200314 | 12.631200552 | 6                                            | 143.99                     |
| Fe                                 | 11.254999638 | 9.341999888  | 8.661599755  |                                              |                            |
| Fe                                 | 11.093399525 | 7.274199724  | 9.962400198  |                                              |                            |
| Fe                                 | 9.090800285  | 7.537400126  | 11.483199596 |                                              |                            |
| Fe                                 | 8.007799983  | 9.743999839  | 11.081199646 |                                              |                            |
| Fe                                 | 9.341599941  | 10.888799429 | 9.358199835  |                                              |                            |
| Fe                                 | 9.006999731  | 8.409000039  | 9.161400199  |                                              |                            |
| Fe                                 | 10.393600464 | 9.429000020  | 10.890200138 |                                              |                            |
| N                                  | 10.720200539 | 11.114799976 | 13.952800035 |                                              |                            |
| N                                  | 9.577800035  | 11.539200544 | 13.761399984 |                                              |                            |

| coordinates of 2N* |              |              |              |
|--------------------|--------------|--------------|--------------|
| Fe                 | 9.428799748  | 9.711400270  | 13.284800053 |
| Fe                 | 11.272200346 | 7.907599807  | 12.507400513 |
| Fe                 | 12.695399523 | 9.020799994  | 10.594400167 |
| Fe                 | 11.594799757 | 11.386400461 | 10.271600485 |
| Fe                 | 9.609799981  | 11.600199938 | 12.069599628 |
| Fe                 | 11.921800375 | 10.334399939 | 12.528200150 |
| Fe                 | 11.219799519 | 9.408400059  | 8.708400130  |
| Fe                 | 11.029200554 | 7.345200181  | 10.039999485 |
| Fe                 | 9.116200209  | 7.576000094  | 11.688200235 |
| Fe                 | 7.999200225  | 9.735400081  | 11.023600101 |
| Fe                 | 9.444800019  | 11.055599451 | 9.438199997  |
| Fe                 | 9.045400023  | 8.460000157  | 9.204800129  |
| Fe                 | 10.343199968 | 9.491000175  | 10.989400148 |
| N                  | 10.645999908 | 11.108599901 | 13.547199965 |
| N                  | 8.032000065  | 10.712800026 | 12.544000149 |

| vibration frequencies of 2N* |                            |  |
|------------------------------|----------------------------|--|
| mode                         | frequency/cm <sup>-1</sup> |  |
| 1                            | 598.78                     |  |
| 2                            | 560.81                     |  |
| 3                            | 558.30                     |  |
| 4                            | 465.93                     |  |
| 5                            | 321.37                     |  |
| 6                            | 267.43                     |  |

| coordinates of 2N*+H* |              |              |              |
|-----------------------|--------------|--------------|--------------|
| Fe                    | 9.253799915  | 9.747999907  | 13.299800158 |
| Fe                    | 11.165000200 | 7.983400226  | 12.676999569 |
| Fe                    | 12.753800154 | 9.216200113  | 10.954600573 |
| Fe                    | 11.505000591 | 11.489599943 | 10.381400585 |
| Fe                    | 9.443399906  | 11.625399590 | 12.075999975 |
| Fe                    | 11.800400019 | 10.450400114 | 12.714600563 |
| Fe                    | 11.451599598 | 9.507600069  | 8.917999864  |
| Fe                    | 11.245399714 | 7.444599867  | 10.261600018 |
| Fe                    | 9.098200202  | 7.597799897  | 11.685800552 |
| Fe                    | 7.980999947  | 9.699400067  | 10.954799652 |
| Fe                    | 9.425399899  | 11.032400131 | 9.441000223  |
| Fe                    | 9.280599952  | 8.444399834  | 9.214199781  |
| Fe                    | 10.326600075 | 9.548199773  | 11.083199978 |
| N                     | 10.403599739 | 11.181999445 | 13.607800007 |
| N                     | 7.858999968  | 10.686800480 | 12.457400560 |
| H                     | 13.424199820 | 10.018199682 | 12.344800234 |

| vibration frequencies of 2N*+H* |                            |  |
|---------------------------------|----------------------------|--|
| mode                            | frequency/cm <sup>-1</sup> |  |
| 1                               | 1358.24                    |  |
| 2                               | 1023.59                    |  |
| 3                               | 598.82                     |  |
| 4                               | 567.22                     |  |
| 5                               | 547.16                     |  |
| 6                               | 470.63                     |  |
| 7                               | 390.47                     |  |
| 8                               | 315.95                     |  |
| 9                               | 263.99                     |  |

| coordinates of N*+NH* |              |              |              |
|-----------------------|--------------|--------------|--------------|
| Fe                    | 9.497200251  | 9.689999819  | 13.285399675 |
| Fe                    | 11.339000463 | 7.843800187  | 12.381600142 |
| Fe                    | 12.790000439 | 8.993800282  | 10.564199686 |
| Fe                    | 11.655600071 | 11.289399862 | 10.162199736 |
| Fe                    | 9.678999782  | 11.604399681 | 12.051999569 |
| Fe                    | 12.107000351 | 10.288000107 | 12.482000589 |
| Fe                    | 11.246999502 | 9.410399795  | 8.721399903  |
| Fe                    | 11.059999466 | 7.351400256  | 10.050400496 |
| Fe                    | 9.027799964  | 7.714200020  | 11.731400490 |
| Fe                    | 7.978600264  | 9.818999767  | 11.148600578 |
| Fe                    | 9.340400100  | 11.052600145 | 9.575200081  |
| Fe                    | 9.062799811  | 8.506000042  | 9.285799861  |
| Fe                    | 10.407999754 | 9.498000145  | 11.010400057 |
| N                     | 10.800800323 | 11.111799479 | 13.568600416 |
| N                     | 8.132600188  | 10.776799917 | 12.655199766 |
| H                     | 10.834000111 | 11.666200161 | 14.433599710 |

| vibration frequencies of N*+NH* |                            |  |
|---------------------------------|----------------------------|--|
| mode                            | frequency/cm <sup>-1</sup> |  |
| 1                               | 3374.58                    |  |
| 2                               | 691.18                     |  |
| 3                               | 605.38                     |  |
| 4                               | 579.28                     |  |
| 5                               | 520.31                     |  |
| 6                               | 512.52                     |  |
| 7                               | 443.44                     |  |
| 8                               | 315.43                     |  |
| 9                               | 252.67                     |  |

| coordinates of N*+NH*+H* |              |              |              |
|--------------------------|--------------|--------------|--------------|
| Fe                       | 9.422799945  | 9.714999795  | 13.301399946 |
| Fe                       | 11.269999743 | 7.897800207  | 12.550400496 |
| Fe                       | 12.829799652 | 9.136400223  | 10.846199989 |
| Fe                       | 11.609599590 | 11.389199495 | 10.283199549 |
| Fe                       | 9.609400034  | 11.626199484 | 12.064199448 |
| Fe                       | 12.061200142 | 10.361200571 | 12.682399750 |
| Fe                       | 11.415799856 | 9.477400184  | 8.876000047  |
| Fe                       | 11.224000454 | 7.425199747  | 10.210000277 |
| Fe                       | 9.035199881  | 7.716799974  | 11.698399782 |
| Fe                       | 7.994599938  | 9.803599715  | 11.102399826 |
| Fe                       | 9.354799986  | 11.023399830 | 9.553200006  |
| Fe                       | 9.234799743  | 8.489400148  | 9.289799929  |
| Fe                       | 10.419000387 | 9.548199773  | 11.095199585 |
| N                        | 10.658199787 | 11.179399490 | 13.643399477 |
| N                        | 8.052600026  | 10.760600567 | 12.605600357 |
| H                        | 10.639599562 | 11.734399796 | 14.507800341 |
| H                        | 13.614799976 | 9.866999984  | 12.221000195 |

| vibration frequencies of N*+NH*+H* |                            |  |
|------------------------------------|----------------------------|--|
| mode                               | Frequency/cm <sup>-1</sup> |  |
| 1                                  | 3381.79                    |  |
| 2                                  | 1372.58                    |  |
| 3                                  | 1065.57                    |  |
| 4                                  | 722.08                     |  |
| 5                                  | 630.48                     |  |
| 6                                  | 582.85                     |  |
| 7                                  | 525.49                     |  |
| 8                                  | 516.94                     |  |
| 9                                  | 457.47                     |  |
| 10                                 | 389.73                     |  |
| 11                                 | 311.11                     |  |
| 12                                 | 255.61                     |  |

| coordinates of N*+NH <sub>2</sub> * |              |              |              |
|-------------------------------------|--------------|--------------|--------------|
| Fe                                  | 9.538599849  | 10.008399487 | 13.180199862 |
| Fe                                  | 11.424000263 | 8.166400194  | 12.401399612 |
| Fe                                  | 12.648999691 | 9.320399761  | 10.501799583 |
| Fe                                  | 11.641399860 | 11.390199661 | 10.052399635 |
| Fe                                  | 9.557399750  | 11.720399857 | 11.242400408 |
| Fe                                  | 11.629799604 | 10.654200315 | 12.507400513 |
| Fe                                  | 11.212400198 | 9.235200286  | 8.583199978  |
| Fe                                  | 10.994000435 | 7.383800149  | 10.121799707 |
| Fe                                  | 9.154000282  | 7.740600109  | 11.907000542 |
| Fe                                  | 7.993999720  | 9.669600129  | 11.120200157 |
| Fe                                  | 9.343799949  | 10.642399788 | 8.963199854  |
| Fe                                  | 8.903599977  | 8.318799734  | 9.329599738  |
| Fe                                  | 10.320800543 | 9.549199939  | 10.831999779 |
| N                                   | 10.985399485 | 10.681600571 | 14.398399591 |
| N                                   | 8.248400092  | 11.008199453 | 12.318199873 |
| H                                   | 10.774199963 | 11.588000059 | 14.827799797 |
| H                                   | 11.413600445 | 10.093599558 | 15.116599798 |

| vibration frequencies of N*+NH <sub>2</sub> * |                            |
|-----------------------------------------------|----------------------------|
| mode                                          | frequency/cm <sup>-1</sup> |
| 1                                             | 3477.06                    |
| 2                                             | 3383.62                    |
| 3                                             | 1506.05                    |
| 4                                             | 656.89                     |
| 5                                             | 634.69                     |
| 6                                             | 585.13                     |
| 7                                             | 552.30                     |
| 8                                             | 474.10                     |
| 9                                             | 434.03                     |
| 10                                            | 397.59                     |
| 11                                            | 268.78                     |
| 12                                            | 117.01                     |

| coordinates of N*+NH <sub>2</sub> *+H* |              |              |              |
|----------------------------------------|--------------|--------------|--------------|
| Fe                                     | 9.582800269  | 10.061399937 | 13.101400137 |
| Fe                                     | 11.195199490 | 8.058999777  | 12.552000284 |
| Fe                                     | 12.738399506 | 9.310399890  | 10.941400528 |
| Fe                                     | 11.556600332 | 11.495200396 | 10.104199648 |
| Fe                                     | 9.482200146  | 11.789599657 | 11.246800423 |
| Fe                                     | 11.701400280 | 10.646400452 | 12.494599819 |
| Fe                                     | 11.374599934 | 9.412199855  | 8.869000077  |
| Fe                                     | 11.173800230 | 7.417600155  | 10.289399624 |
| Fe                                     | 9.031199813  | 7.680799961  | 11.720999479 |
| Fe                                     | 7.926399708  | 9.689000249  | 11.101800203 |
| Fe                                     | 9.193199873  | 10.664600134 | 9.096000195  |
| Fe                                     | 9.037799835  | 8.299199939  | 9.315999746  |
| Fe                                     | 10.312800407 | 9.583600163  | 10.906000137 |
| N                                      | 10.977400541 | 10.678800344 | 14.341399670 |
| N                                      | 8.230999708  | 10.961199999 | 12.351200581 |
| H                                      | 10.788799524 | 11.595000029 | 14.760600328 |
| H                                      | 11.390600204 | 10.083999634 | 15.063199997 |
| H                                      | 13.357000351 | 10.409599543 | 12.133799791 |

| vibration frequencies of N*+NH <sub>2</sub> *+H* |                            |
|--------------------------------------------------|----------------------------|
| mode                                             | frequency/cm <sup>-1</sup> |
| 1                                                | 3471.57                    |
| 2                                                | 3383.00                    |
| 3                                                | 1508.11                    |
| 4                                                | 1341.78                    |
| 5                                                | 971.48                     |
| 6                                                | 679.75                     |
| 7                                                | 640.73                     |
| 8                                                | 605.74                     |
| 9                                                | 555.93                     |
| 10                                               | 492.84                     |
| 11                                               | 455.29                     |
| 12                                               | 404.89                     |
| 13                                               | 294.42                     |
| 14                                               | 286.26                     |
| 15                                               | 127.18                     |

| coordinates of N*+NH <sub>3</sub> * |              |              |              | vibration frequencies of N*+NH <sub>3</sub> * |                            |
|-------------------------------------|--------------|--------------|--------------|-----------------------------------------------|----------------------------|
|                                     |              |              |              | mode                                          | frequency/cm <sup>-1</sup> |
| Fe                                  | 10.179599524 | 10.224000216 | 13.046000004 | 1                                             | 3497.95                    |
| Fe                                  | 11.723400354 | 8.445600271  | 12.451399565 | 2                                             | 3477.14                    |
| Fe                                  | 12.709800005 | 9.124799967  | 10.257200003 | 3                                             | 3368.66                    |
| Fe                                  | 11.534399986 | 11.371400356 | 9.460999966  | 4                                             | 1612.09                    |
| Fe                                  | 9.785000086  | 11.828399897 | 11.062799692 | 5                                             | 1600.81                    |
| Fe                                  | 12.197999954 | 10.920399427 | 11.699800491 | 6                                             | 1138.32                    |
| Fe                                  | 10.946400166 | 9.142000079  | 8.532599807  | 7                                             | 566.96                     |
| Fe                                  | 10.934400558 | 7.334399819  | 10.255000591 | 8                                             | 546.63                     |
| Fe                                  | 9.477400184  | 7.809600234  | 12.089400291 | 9                                             | 528.13                     |
| Fe                                  | 8.187199831  | 9.835199714  | 11.448199749 | 10                                            | 428.68                     |
| Fe                                  | 9.035000205  | 10.584000349 | 9.061400294  | 11                                            | 404.83                     |
| Fe                                  | 8.690000176  | 8.305199742  | 9.648200274  | 12                                            | 322.26                     |
| Fe                                  | 10.423599482 | 9.598199725  | 10.742199421 | 13                                            | 173.23                     |
| N                                   | 10.427600145 | 10.564399958 | 15.087800026 | 14                                            | 97.19                      |
| N                                   | 8.748599887  | 11.240999699 | 12.452800274 | 15                                            | 71.04                      |
| H                                   | 9.928399920  | 11.426199675 | 12.452800274 |                                               |                            |
| H                                   | 10.034400225 | 9.798200130  | 15.642800331 |                                               |                            |
| H                                   | 11.409800053 | 10.673400164 | 15.351799726 |                                               |                            |

| coordinates of N* |              |              |              | vibration frequencies of N* |                            |
|-------------------|--------------|--------------|--------------|-----------------------------|----------------------------|
|                   |              |              |              | mode                        | frequency/cm <sup>-1</sup> |
| Fe                | 8.883951902  | 9.493344426  | 12.992488146 | 1                           | 551.55                     |
| Fe                | 10.975458622 | 8.023671508  | 12.699639797 | 2                           | 422.52                     |
| Fe                | 12.517566681 | 9.305171967  | 11.033648252 | 3                           | 421.05                     |
| Fe                | 11.524119377 | 11.488271952 | 10.494816303 |                             |                            |
| Fe                | 9.362909198  | 11.586617231 | 11.559101343 |                             |                            |
| Fe                | 11.170228720 | 10.408957005 | 12.884196043 |                             |                            |
| Fe                | 11.377856731 | 9.473564029  | 8.776189089  |                             |                            |
| Fe                | 11.061980724 | 7.393581271  | 10.239032507 |                             |                            |
| Fe                | 8.912265301  | 7.533326745  | 11.539425850 |                             |                            |
| Fe                | 7.883105278  | 9.678127170  | 10.606583357 |                             |                            |
| Fe                | 9.600555897  | 10.941621065 | 9.078139067  |                             |                            |
| Fe                | 9.162754416  | 8.346246481  | 9.032797217  |                             |                            |
| Fe                | 10.218933821 | 9.464575648  | 10.891965628 |                             |                            |
| N                 | 7.838714719  | 10.721124411 | 12.127978802 |                             |                            |

| coordinates of N*+H* |              |              |              |
|----------------------|--------------|--------------|--------------|
| Fe                   | 8.867582679  | 9.483841062  | 12.981339693 |
| Fe                   | 10.995278358 | 8.018876314  | 12.710368633 |
| Fe                   | 12.516636848 | 9.283627272  | 10.994004011 |
| Fe                   | 11.501379013 | 11.489264965 | 10.470263958 |
| Fe                   | 9.320968390  | 11.577817202 | 11.534439325 |
| Fe                   | 11.143054962 | 10.404955149 | 12.860267162 |
| Fe                   | 11.366342306 | 9.443842173  | 8.776047826  |
| Fe                   | 11.052668095 | 7.368297577  | 10.266435146 |
| Fe                   | 8.958460689  | 7.501072288  | 11.577647924 |
| Fe                   | 7.853902578  | 9.639650583  | 10.578548908 |
| Fe                   | 9.611541033  | 10.968468189 | 9.079589844  |
| Fe                   | 9.128675461  | 8.394522667  | 9.076851010  |
| Fe                   | 10.221339464 | 9.465783834  | 10.904607773 |
| N                    | 7.830459476  | 10.686349869 | 12.108702660 |
| H                    | 7.408710718  | 8.713829517  | 9.207885265  |

| vibration frequencies of N*+H* |                            |
|--------------------------------|----------------------------|
| mode                           | frequency/cm <sup>-1</sup> |
| 1                              | 1372.12                    |
| 2                              | 987.47                     |
| 3                              | 558.24                     |
| 4                              | 443.17                     |
| 5                              | 436.83                     |
| 6                              | 383.99                     |

| coordinates of NH* |              |              |              |
|--------------------|--------------|--------------|--------------|
| Fe                 | 8.959159255  | 9.500040412  | 12.963589430 |
| Fe                 | 10.891878605 | 7.955712080  | 12.696161270 |
| Fe                 | 12.507256269 | 9.374983311  | 11.076374054 |
| Fe                 | 11.522843838 | 11.536514759 | 10.484091043 |
| Fe                 | 9.431023598  | 11.601454020 | 11.563721895 |
| Fe                 | 11.256850958 | 10.364642143 | 12.880176306 |
| Fe                 | 11.284395456 | 9.491377473  | 8.797242641  |
| Fe                 | 11.091222763 | 7.402653694  | 10.308684111 |
| Fe                 | 8.867951632  | 7.525375485  | 11.525696516 |
| Fe                 | 7.895464301  | 9.702229500  | 10.584105253 |
| Fe                 | 9.539610744  | 10.985950232 | 9.105061293  |
| Fe                 | 9.137341976  | 8.289664388  | 9.086499810  |
| Fe                 | 10.224574804 | 9.477054477  | 10.879768133 |
| N                  | 7.779198289  | 10.800206661 | 12.188042402 |
| H                  | 6.947228312  | 11.219340563 | 12.617787123 |

| vibration frequencies of NH* |                            |
|------------------------------|----------------------------|
| mode                         | frequency/cm <sup>-1</sup> |
| 1                            | 3390.54                    |
| 2                            | 604.77                     |
| 3                            | 594.50                     |
| 4                            | 511.54                     |
| 5                            | 358.14                     |
| 6                            | 349.04                     |



---

| coordinates of NH*+H* |              |              |              |
|-----------------------|--------------|--------------|--------------|
| Fe                    | 8.893275857  | 9.493945241  | 12.983776331 |
| Fe                    | 10.871052742 | 7.965846062  | 12.692999840 |
| Fe                    | 12.482513189 | 9.257346392  | 11.012219191 |
| Fe                    | 11.493841410 | 11.489657164 | 10.445728302 |
| Fe                    | 9.405645728  | 11.592346430 | 11.567865610 |
| Fe                    | 11.276965141 | 10.330659151 | 12.795858383 |
| Fe                    | 11.246292591 | 9.543910027  | 8.799687028  |
| Fe                    | 11.021420956 | 7.469006181  | 10.210558176 |
| Fe                    | 8.825486898  | 7.539463639  | 11.622281075 |
| Fe                    | 7.700529099  | 9.766212702  | 10.673600435 |
| Fe                    | 9.440829754  | 10.954213142 | 9.113652110  |
| Fe                    | 8.928439617  | 8.427580595  | 9.222398400  |
| Fe                    | 10.136648417 | 9.478963614  | 10.907881260 |
| N                     | 7.765713930  | 10.859959126 | 12.268095016 |
| N                     | 6.990436912  | 11.334537268 | 12.742757797 |
| H                     | 7.235307097  | 8.817555904  | 9.349241257  |

---

---

| vibration frequencies of NH*+H* |                            |
|---------------------------------|----------------------------|
| mode                            | frequency/cm <sup>-1</sup> |
| 1                               | 3396.90                    |
| 2                               | 1370.45                    |
| 3                               | 1045.42                    |
| 4                               | 624.65                     |
| 5                               | 603.31                     |
| 6                               | 522.06                     |
| 7                               | 380.56                     |
| 8                               | 377.89                     |
| 9                               | 353.84                     |

---

---

| coordinates of NH <sub>2</sub> * |              |              |              |
|----------------------------------|--------------|--------------|--------------|
| Fe                               | 9.467595816  | 8.862472177  | 13.266227245 |
| Fe                               | 11.444648504 | 7.790904045  | 12.527576685 |
| Fe                               | 12.577359676 | 9.367957711  | 10.720386505 |
| Fe                               | 11.350013018 | 11.493519545 | 10.581122637 |
| Fe                               | 9.298404455  | 11.250305176 | 12.038514614 |
| Fe                               | 11.459547281 | 10.252799988 | 12.843199968 |
| Fe                               | 11.207256317 | 9.608536363  | 8.737902045  |
| Fe                               | 11.143994331 | 7.373841405  | 10.164241791 |
| Fe                               | 9.106336236  | 7.306014895  | 11.476120949 |
| Fe                               | 7.954739332  | 9.568678141  | 11.224377155 |
| Fe                               | 9.361775517  | 10.968519449 | 9.402454495  |
| Fe                               | 9.069297910  | 8.511876464  | 9.194720387  |
| Fe                               | 10.283286572 | 9.367067814  | 11.011519432 |
| N                                | 7.296164036  | 11.209589243 | 12.179108858 |
| H                                | 6.747236252  | 11.910940409 | 11.677796841 |
| H                                | 6.872744560  | 11.079779863 | 13.100131750 |

---

---

| vibration frequencies of NH <sub>2</sub> * |                            |
|--------------------------------------------|----------------------------|
| mode                                       | frequency/cm <sup>-1</sup> |
| 1                                          | 3489.17                    |
| 2                                          | 3408.94                    |
| 3                                          | 1499.75                    |
| 4                                          | 638.97                     |
| 5                                          | 634.55                     |
| 6                                          | 581.42                     |
| 7                                          | 466.76                     |
| 8                                          | 260.20                     |
| 9                                          | 123.20                     |

---

| coordinates of $\text{NH}_2^+\text{H}^*$ |              |              |              |
|------------------------------------------|--------------|--------------|--------------|
| Fe                                       | 9.431402683  | 8.908807635  | 13.308377266 |
| Fe                                       | 11.227995157 | 7.639645934  | 12.425271273 |
| Fe                                       | 12.516351938 | 9.269205332  | 10.728998184 |
| Fe                                       | 11.268136501 | 11.487368345 | 10.569522381 |
| Fe                                       | 9.280327559  | 11.307063103 | 12.095012665 |
| Fe                                       | 11.351758242 | 10.257341862 | 12.835069895 |
| Fe                                       | 11.214764118 | 9.667525887  | 8.767437935  |
| Fe                                       | 11.116334200 | 7.361742258  | 10.025950670 |
| Fe                                       | 9.028897285  | 7.312579155  | 11.473678350 |
| Fe                                       | 7.900882363  | 9.608931541  | 11.354677677 |
| Fe                                       | 9.270977378  | 10.951790810 | 9.478949904  |
| Fe                                       | 9.183286428  | 8.423504829  | 9.159139395  |
| Fe                                       | 10.217567682 | 9.364153147  | 11.020290852 |
| N                                        | 7.298096418  | 11.335929632 | 12.195280790 |
| H                                        | 6.799780130  | 12.027295828 | 11.632009745 |
| H                                        | 6.817537546  | 11.256266832 | 13.093085289 |
| H                                        | 7.449503541  | 7.939249277  | 11.614650488 |

| vibration frequencies of $\text{NH}_2^+\text{H}^*$ |                             |
|----------------------------------------------------|-----------------------------|
| mode                                               | frequency/ $\text{cm}^{-1}$ |
| 1                                                  | 3495.02                     |
| 2                                                  | 3411.80                     |
| 3                                                  | 1498.99                     |
| 4                                                  | 1225.41                     |
| 5                                                  | 1066.22                     |
| 6                                                  | 636.52                      |
| 7                                                  | 618.05                      |
| 8                                                  | 582.04                      |
| 9                                                  | 474.53                      |
| 10                                                 | 277.74                      |
| 11                                                 | 247.48                      |
| 12                                                 | 121.21                      |

| coordinates of $\text{NH}_3^*$ |              |              |              |
|--------------------------------|--------------|--------------|--------------|
| Fe                             | 9.294599295  | 8.616870046  | 13.055422306 |
| Fe                             | 11.532495022 | 7.793658972  | 12.519056797 |
| Fe                             | 12.705136538 | 9.499657154  | 10.922899246 |
| Fe                             | 11.033425331 | 11.444514990 | 10.510270596 |
| Fe                             | 8.860939741  | 10.814912319 | 11.835088730 |
| Fe                             | 11.304346323 | 10.225878954 | 12.738770247 |
| Fe                             | 11.423574686 | 9.740790129  | 8.877392411  |
| Fe                             | 11.547775269 | 7.438331246  | 10.148500204 |
| Fe                             | 9.378836751  | 6.994059682  | 11.317435503 |
| Fe                             | 7.863116264  | 8.835045695  | 10.878624916 |
| Fe                             | 9.041126370  | 10.635108948 | 9.368857145  |
| Fe                             | 9.364994168  | 8.291198015  | 9.011152387  |
| Fe                             | 10.279120207 | 9.205195308  | 10.938495398 |
| N                              | 7.351849079  | 12.038996220 | 12.593710423 |
| H                              | 6.718234420  | 12.273702621 | 11.826556921 |
| H                              | 6.818779111  | 11.512382030 | 13.288694620 |
| H                              | 7.669650912  | 12.910298109 | 13.024473190 |

| vibration frequencies of $\text{NH}_3^*$ |                             |
|------------------------------------------|-----------------------------|
| mode                                     | frequency/ $\text{cm}^{-1}$ |
| 1                                        | 3509.88                     |
| 2                                        | 3505.88                     |
| 3                                        | 3394.55                     |
| 4                                        | 1603.92                     |
| 5                                        | 1594.12                     |
| 6                                        | 1129.23                     |
| 7                                        | 512.24                      |
| 8                                        | 491.49                      |
| 9                                        | 325.52                      |
| 10                                       | 78.38                       |
| 11                                       | 65.39                       |
| 12                                       | 41.78                       |

**Table S7** The XYZ coordinates and vibration frequencies of the intermediates in the hydrogenation process of the Fe<sub>12</sub>Nb cluster.

| coordinates of N <sub>2</sub> (t)* |              |              |              | vibration frequencies of N <sub>2</sub> (t)* |                            |
|------------------------------------|--------------|--------------|--------------|----------------------------------------------|----------------------------|
| Fe                                 | 9.106600285  | 9.018999934  | 12.984600067 | mode                                         | frequency/cm <sup>-1</sup> |
| Fe                                 | 10.926799774 | 7.505000234  | 12.410999537 | 1                                            | 2094.96                    |
| Fe                                 | 12.634600401 | 8.961200118  | 11.144200563 | 2                                            | 310.45                     |
| Fe                                 | 11.839200258 | 11.208000183 | 10.640200377 | 3                                            | 264.30                     |
| Fe                                 | 9.848200083  | 11.302200556 | 12.036600113 | 4                                            | 254.77                     |
| Fe                                 | 11.432199478 | 9.542800188  | 8.841800094  | 5                                            | 52.63                      |
| Fe                                 | 10.846400261 | 7.301800251  | 9.827600121  | 6                                            | 35.49                      |
| Fe                                 | 8.790400028  | 7.381200194  | 11.173800230 |                                              |                            |
| Fe                                 | 8.000800014  | 9.671000242  | 10.759400129 |                                              |                            |
| Fe                                 | 9.646400213  | 10.987000465 | 9.395200014  |                                              |                            |
| Fe                                 | 9.068199992  | 8.602399826  | 8.936399817  |                                              |                            |
| Fe                                 | 10.323799849 | 9.292799830  | 10.950200558 |                                              |                            |
| Nb                                 | 11.655800343 | 10.040800571 | 13.095999956 |                                              |                            |
| N                                  | 13.121399879 | 11.377199888 | 13.935799599 |                                              |                            |
| N                                  | 13.885200024 | 12.029000521 | 14.474799633 |                                              |                            |

  

| coordinates of N <sub>2</sub> (h)* |              |              |              | vibration frequencies of N <sub>2</sub> (h)* |                            |
|------------------------------------|--------------|--------------|--------------|----------------------------------------------|----------------------------|
| Fe                                 | 9.470199943  | 9.557600021  | 13.119200468 | mode                                         | frequency/cm <sup>-1</sup> |
| Fe                                 | 11.382800341 | 7.902799845  | 12.344599962 | 1                                            | 1240.45                    |
| Fe                                 | 12.718600035 | 9.211999774  | 10.509400368 | 2                                            | 436.08                     |
| Fe                                 | 11.607799530 | 11.394399405 | 10.448399782 | 3                                            | 412.73                     |
| Fe                                 | 9.604799747  | 11.522599459 | 11.743600368 | 4                                            | 277.31                     |
| Fe                                 | 11.308399439 | 9.350200295  | 8.543000221  | 5                                            | 226.12                     |
| Fe                                 | 11.010799408 | 7.324799895  | 9.822199941  | 6                                            | 194.42                     |
| Fe                                 | 9.091399908  | 7.546600103  | 11.545399427 |                                              |                            |
| Fe                                 | 8.085200191  | 9.691799879  | 11.046400070 |                                              |                            |
| Fe                                 | 9.420999885  | 10.683599710 | 9.197999835  |                                              |                            |
| Fe                                 | 9.016000032  | 8.275399804  | 9.142000079  |                                              |                            |
| Fe                                 | 10.404599905 | 9.415400028  | 10.832200050 |                                              |                            |
| Nb                                 | 11.817799807 | 10.240999460 | 12.869000435 |                                              |                            |
| N                                  | 12.999999523 | 8.608599901  | 13.455200195 |                                              |                            |
| N                                  | 13.305200338 | 8.616600037  | 12.202199697 |                                              |                            |

| coordinates of 2N* |              |              |              |
|--------------------|--------------|--------------|--------------|
| Fe                 | 9.272000194  | 9.301000237  | 13.028800488 |
| Fe                 | 11.479799747 | 7.878599763  | 12.553800344 |
| Fe                 | 12.712399960 | 8.992800117  | 10.472199917 |
| Fe                 | 11.668399572 | 11.314599514 | 10.342400074 |
| Fe                 | 9.752799869  | 11.492600441 | 11.697599888 |
| Fe                 | 11.206200123 | 9.495999813  | 8.618400097  |
| Fe                 | 10.962200165 | 7.258200049  | 10.017199516 |
| Fe                 | 9.124400020  | 7.401800156  | 11.475600004 |
| Fe                 | 7.981399894  | 9.612399936  | 10.963399410 |
| Fe                 | 9.334400296  | 10.859600306 | 9.341199994  |
| Fe                 | 9.038599730  | 8.459200263  | 9.118800163  |
| Fe                 | 10.405199528 | 9.366800189  | 10.930399895 |
| Nb                 | 11.967999935 | 10.235600471 | 12.928800583 |
| N                  | 10.818599463 | 9.058399796  | 13.972400427 |
| N                  | 13.149800301 | 8.852199912  | 12.245800495 |

| vibration frequencies of 2N* |                            |
|------------------------------|----------------------------|
| mode                         | frequency/cm <sup>-1</sup> |
| 1                            | 626.33                     |
| 2                            | 583.05                     |
| 3                            | 531.38                     |
| 4                            | 466.46                     |
| 5                            | 317.36                     |
| 6                            | 309.17                     |

| coordinates of 2N*+H* |              |              |              |
|-----------------------|--------------|--------------|--------------|
| Fe                    | 9.295799732  | 9.289399981  | 13.033000231 |
| Fe                    | 11.479400396 | 7.886000276  | 12.566200495 |
| Fe                    | 12.717200518 | 8.963999748  | 10.453000069 |
| Fe                    | 11.549600363 | 11.347199678 | 10.379600525 |
| Fe                    | 9.677799940  | 11.453000307 | 11.797800064 |
| Fe                    | 11.283600330 | 9.355000257  | 8.657600284  |
| Fe                    | 10.911400318 | 7.189999819  | 10.058200359 |
| Fe                    | 9.072999954  | 7.425400019  | 11.490399837 |
| Fe                    | 8.018199801  | 9.716799855  | 10.911200047 |
| Fe                    | 9.445199966  | 10.841200352 | 9.286000133  |
| Fe                    | 9.062799811  | 8.441799879  | 9.110800028  |
| Fe                    | 10.406800508 | 9.338600039  | 10.949200392 |
| Nb                    | 11.995600462 | 10.246399641 | 12.919199467 |
| N                     | 10.842800140 | 9.085599780  | 13.976000547 |
| N                     | 13.143399954 | 8.837400079  | 12.237800360 |
| H                     | 12.989000082 | 8.994399905  | 8.759400249  |

| vibration frequencies of 2N*+H* |                            |
|---------------------------------|----------------------------|
| mode                            | frequency/cm <sup>-1</sup> |
| 1                               | 1359.56                    |
| 2                               | 1011.72                    |
| 3                               | 627.19                     |
| 4                               | 587.42                     |
| 5                               | 526.50                     |
| 6                               | 469.86                     |
| 7                               | 392.27                     |
| 8                               | 333.97                     |
| 9                               | 311.85                     |

| coordinates of N*+NH* |              |              |              |
|-----------------------|--------------|--------------|--------------|
| Fe                    | 9.259799719  | 9.297000170  | 13.033599854 |
| Fe                    | 11.455999613 | 7.888799906  | 12.561000586 |
| Fe                    | 12.731000185 | 9.126799703  | 10.426199436 |
| Fe                    | 11.569399834 | 11.388599873 | 10.288000107 |
| Fe                    | 9.754800200  | 11.472799778 | 11.764400005 |
| Fe                    | 11.216200590 | 9.496200085  | 8.594400287  |
| Fe                    | 10.950399637 | 7.271800041  | 10.026600361 |
| Fe                    | 9.122599959  | 7.387999892  | 11.534399986 |
| Fe                    | 8.021000028  | 9.588000178  | 10.923199654 |
| Fe                    | 9.362999797  | 10.853799582 | 9.304800034  |
| Fe                    | 9.082000256  | 8.400200009  | 9.092800021  |
| Fe                    | 10.423599482 | 9.367600083  | 10.927000046 |
| Nb                    | 11.905000210 | 10.255800486 | 12.993400097 |
| N                     | 10.795799494 | 9.165199995  | 14.052799940 |
| N                     | 13.235800266 | 8.850600123  | 12.254199982 |
| H                     | 14.124799967 | 8.456599712  | 12.575999498 |

| vibration frequencies of N*+NH* |                            |
|---------------------------------|----------------------------|
| mode                            | frequency/cm <sup>-1</sup> |
| 1                               | 3428.28                    |
| 2                               | 675.40                     |
| 3                               | 561.11                     |
| 4                               | 536.73                     |
| 5                               | 520.21                     |
| 6                               | 470.48                     |
| 7                               | 431.88                     |
| 8                               | 281.94                     |
| 9                               | 241.20                     |

| coordinates of N*+NH*+H* |              |              |              |
|--------------------------|--------------|--------------|--------------|
| Fe                       | 9.257400036  | 9.243599772  | 13.027600050 |
| Fe                       | 11.482199430 | 7.908200026  | 12.538399696 |
| Fe                       | 12.803200483 | 9.248200059  | 10.473400354 |
| Fe                       | 11.497600079 | 11.483600140 | 10.439000130 |
| Fe                       | 9.656999707  | 11.440199614 | 11.879800558 |
| Fe                       | 11.329400539 | 9.564800262  | 8.703399897  |
| Fe                       | 10.983999968 | 7.326400280  | 9.997599721  |
| Fe                       | 9.135800004  | 7.393400073  | 11.466000080 |
| Fe                       | 8.035200238  | 9.613000154  | 10.866600275 |
| Fe                       | 9.418600202  | 10.914000273 | 9.322800040  |
| Fe                       | 9.138799906  | 8.467400074  | 9.045199752  |
| Fe                       | 10.424400568 | 9.390400052  | 10.963000059 |
| Nb                       | 11.878600121 | 10.268399715 | 13.046200275 |
| N                        | 10.776000023 | 9.128999710  | 14.062999487 |
| N                        | 13.244600296 | 8.901600242  | 12.301800251 |
| H                        | 14.151599407 | 8.532599807  | 12.602800131 |
| H                        | 13.071199656 | 9.434999824  | 8.810799718  |

| vibration frequencies of N*+NH*+H* |                            |
|------------------------------------|----------------------------|
| mode                               | frequency/cm <sup>-1</sup> |
| 1                                  | 3422.58                    |
| 2                                  | 1375.75                    |
| 3                                  | 1044.09                    |
| 4                                  | 674.82                     |
| 5                                  | 588.96                     |
| 6                                  | 566.46                     |
| 7                                  | 530.65                     |
| 8                                  | 481.32                     |
| 9                                  | 444.76                     |
| 10                                 | 387.75                     |
| 11                                 | 287.79                     |
| 12                                 | 242.71                     |

| coordinates of N*+NH <sub>2</sub> * |              |              |              |
|-------------------------------------|--------------|--------------|--------------|
| Fe                                  | 9.119600058  | 9.276199937  | 12.960799932 |
| Fe                                  | 10.856599808 | 7.430800200  | 12.465200424 |
| Fe                                  | 12.620799541 | 8.732200265  | 10.912400484 |
| Fe                                  | 11.573599577 | 11.303199530 | 10.325599909 |
| Fe                                  | 9.800999761  | 11.460800171 | 11.825599670 |
| Fe                                  | 11.367000341 | 9.358999729  | 8.896399736  |
| Fe                                  | 10.757199526 | 7.092000246  | 10.099600554 |
| Fe                                  | 8.667600155  | 7.451000214  | 11.329599619 |
| Fe                                  | 7.967000008  | 9.827799797  | 10.837999582 |
| Fe                                  | 9.403799772  | 10.990400314 | 9.333599806  |
| Fe                                  | 8.990600109  | 8.519200087  | 9.056599736  |
| Fe                                  | 10.298800468 | 9.283400178  | 10.913000107 |
| Nb                                  | 11.853799820 | 9.988999963  | 12.833600044 |
| N                                   | 10.743399858 | 8.799200058  | 13.825399876 |
| N                                   | 13.904999495 | 9.408599734  | 12.335200310 |
| H                                   | 14.383399487 | 8.679199815  | 12.869000435 |
| H                                   | 14.613800049 | 10.073599815 | 12.014600039 |

| vibration frequencies of N*+NH <sub>2</sub> * |                            |
|-----------------------------------------------|----------------------------|
| mode                                          | frequency/cm <sup>-1</sup> |
| 1                                             | 3480.78                    |
| 2                                             | 3393.30                    |
| 3                                             | 1498.61                    |
| 4                                             | 661.76                     |
| 5                                             | 646.00                     |
| 6                                             | 629.91                     |
| 7                                             | 553.12                     |
| 8                                             | 472.35                     |
| 9                                             | 445.35                     |
| 10                                            | 363.74                     |
| 11                                            | 258.95                     |
| 12                                            | 124.40                     |

| coordinates of N*+NH <sub>2</sub> *+H* |              |              |              |
|----------------------------------------|--------------|--------------|--------------|
| Fe                                     | 9.135199785  | 9.214000106  | 13.003000021 |
| Fe                                     | 10.874999762 | 7.387400270  | 12.457200289 |
| Fe                                     | 12.632800341 | 8.719999790  | 10.867400169 |
| Fe                                     | 11.689200401 | 11.231000423 | 10.236799717 |
| Fe                                     | 9.954599738  | 11.446000338 | 11.853200197 |
| Fe                                     | 11.397000551 | 9.320999980  | 8.876600266  |
| Fe                                     | 10.722600222 | 7.111399770  | 10.089999437 |
| Fe                                     | 8.660200238  | 7.440199852  | 11.355199814 |
| Fe                                     | 7.997400165  | 9.810799956  | 10.929800272 |
| Fe                                     | 9.462000132  | 11.049200296 | 9.419199824  |
| Fe                                     | 9.024000168  | 8.630399704  | 9.058600068  |
| Fe                                     | 10.305999517 | 9.277999997  | 10.932799578 |
| Nb                                     | 11.825200319 | 9.987800121  | 12.848999500 |
| N                                      | 10.788600445 | 8.714200258  | 13.831599951 |
| N                                      | 13.875999451 | 9.375200272  | 12.319200039 |
| H                                      | 14.349000454 | 8.651800156  | 12.865600586 |
| H                                      | 14.587399960 | 10.045000315 | 12.017799616 |
| H                                      | 11.292200089 | 11.928199530 | 12.825000286 |

| vibration frequencies of N*+NH <sub>2</sub> *+H* |                            |
|--------------------------------------------------|----------------------------|
| mode                                             | frequency/cm <sup>-1</sup> |
| 1                                                | 3486.47                    |
| 2                                                | 3408.02                    |
| 3                                                | 1499.97                    |
| 4                                                | 1258.32                    |
| 5                                                | 977.18                     |
| 6                                                | 655.07                     |
| 7                                                | 637.02                     |
| 8                                                | 620.79                     |
| 9                                                | 549.70                     |
| 10                                               | 467.10                     |
| 11                                               | 445.16                     |
| 12                                               | 374.08                     |
| 13                                               | 291.38                     |
| 14                                               | 269.95                     |
| 15                                               | 129.22                     |

| coordinates of N*+NH <sub>3</sub> * |               |              |              | vibration frequencies of N*+NH <sub>3</sub> * |                            |
|-------------------------------------|---------------|--------------|--------------|-----------------------------------------------|----------------------------|
|                                     |               |              |              | mode                                          | frequency/cm <sup>-1</sup> |
| Fe                                  | 9.344599843   | 9.108200073  | 12.970399857 |                                               |                            |
| Fe                                  | 10.657999516  | 7.160000205  | 12.022999525 | 1                                             | 3488.03                    |
| Fe                                  | 12.4444000244 | 8.120200038  | 10.606000423 | 2                                             | 3474.52                    |
| Fe                                  | 12.082999945  | 10.693800449 | 10.350799561 | 3                                             | 3347.27                    |
| Fe                                  | 10.424599648  | 11.182600260 | 11.983599663 | 4                                             | 1605.34                    |
| Fe                                  | 11.221400499  | 9.132199883  | 8.750600219  | 5                                             | 1592.50                    |
| Fe                                  | 10.007599592  | 7.105600238  | 9.643399715  | 6                                             | 1156.26                    |
| Fe                                  | 8.252599835   | 7.688599825  | 11.215000153 | 7                                             | 627.04                     |
| Fe                                  | 8.024799824   | 10.056200027 | 11.118999720 | 8                                             | 531.27                     |
| Fe                                  | 9.645000100   | 10.986800194 | 9.548199773  | 9                                             | 492.03                     |
| Fe                                  | 8.621399999   | 8.902000189  | 8.968600035  | 10                                            | 447.19                     |
| Fe                                  | 10.233999491  | 9.136999846  | 10.812000036 | 11                                            | 346.03                     |
| Nb                                  | 12.118599415  | 9.384800196  | 12.746599913 | 12                                            | 306.74                     |
| N                                   | 10.901999474  | 8.199399710  | 13.613799810 | 13                                            | 108.46                     |
| N                                   | 14.094599485  | 9.989399910  | 13.857400417 | 14                                            | 90.43                      |
| H                                   | 14.011600018  | 10.093400478 | 14.872800112 | 15                                            | 77.51                      |
| H                                   | 14.423999786  | 10.880800486 | 13.475400209 |                                               |                            |
| H                                   | 14.819600582  | 9.289199710  | 13.668400049 |                                               |                            |

| coordinates of N* |              |              |              | vibration frequencies of N* |                            |
|-------------------|--------------|--------------|--------------|-----------------------------|----------------------------|
|                   |              |              |              | mode                        | frequency/cm <sup>-1</sup> |
| Fe                | 9.123573303  | 9.255424142  | 12.940183878 |                             |                            |
| Fe                | 10.994704962 | 7.497907281  | 12.433040142 | 1                           | 647.45                     |
| Fe                | 12.598683834 | 8.788430095  | 11.039832830 | 2                           | 444.08                     |
| Fe                | 11.752158403 | 11.112947464 | 10.382813215 | 3                           | 350.28                     |
| Fe                | 9.869294763  | 11.462435722 | 11.827684641 |                             |                            |
| Fe                | 11.223485470 | 9.280700088  | 8.801620007  |                             |                            |
| Fe                | 10.699266195 | 7.169074416  | 9.970920682  |                             |                            |
| Fe                | 8.750247955  | 7.421844006  | 11.334332228 |                             |                            |
| Fe                | 7.942582369  | 9.826657772  | 10.787469149 |                             |                            |
| Fe                | 9.449664354  | 10.976359844 | 9.341092110  |                             |                            |
| Fe                | 8.866564035  | 8.542551994  | 9.017424583  |                             |                            |
| Fe                | 10.267300606 | 9.300315380  | 10.910230875 |                             |                            |
| Nb                | 11.747410297 | 10.107227564 | 12.978867292 |                             |                            |
| N                 | 10.735862255 | 8.772324324  | 13.849889040 |                             |                            |

---

| coordinates of N*+H* |              |              |              |
|----------------------|--------------|--------------|--------------|
| Fe                   | 9.061356783  | 9.325945377  | 12.960546017 |
| Fe                   | 10.928395987 | 7.519773841  | 12.434356213 |
| Fe                   | 12.580851316 | 8.794631958  | 11.003925800 |
| Fe                   | 11.770005226 | 11.096553802 | 10.348204374 |
| Fe                   | 9.906556010  | 11.505206823 | 11.821926832 |
| Fe                   | 11.198618412 | 9.249027967  | 8.727405667  |
| Fe                   | 10.742529631 | 7.127140760  | 10.002620220 |
| Fe                   | 8.722850084  | 7.444027066  | 11.269490719 |
| Fe                   | 7.969108820  | 9.878202677  | 10.923817158 |
| Fe                   | 9.500408769  | 10.994323492 | 9.337816834  |
| Fe                   | 8.872749805  | 8.555616736  | 9.050551653  |
| Fe                   | 10.292743444 | 9.306116700  | 10.895819664 |
| Nb                   | 11.728216410 | 10.131393671 | 13.014423847 |
| N                    | 10.680223703 | 8.811022639  | 13.835422993 |
| H                    | 7.444785833  | 9.726216197  | 12.609071732 |

---

---

| vibration frequencies of N*+H* |                            |
|--------------------------------|----------------------------|
| mode                           | frequency/cm <sup>-1</sup> |
| 1                              | 1356.19                    |
| 2                              | 1006.41                    |
| 3                              | 667.30                     |
| 4                              | 453.05                     |
| 5                              | 377.64                     |
| 6                              | 376.12                     |

---

---

| coordinates of NH* |              |              |              |
|--------------------|--------------|--------------|--------------|
| Fe                 | 9.245861769  | 9.242060781  | 12.932239771 |
| Fe                 | 11.068385839 | 7.608649135  | 12.533183098 |
| Fe                 | 12.604818344 | 8.935765028  | 10.875577927 |
| Fe                 | 11.761579514 | 11.191977262 | 10.272827148 |
| Fe                 | 9.924893975  | 11.497417688 | 11.747570038 |
| Fe                 | 11.107872725 | 9.282854199  | 8.709074855  |
| Fe                 | 10.728569031 | 7.119160891  | 10.127049685 |
| Fe                 | 8.780659437  | 7.433433533  | 11.380248070 |
| Fe                 | 7.987869382  | 9.886517525  | 10.791500807 |
| Fe                 | 9.482458234  | 11.021749973 | 9.266176820  |
| Fe                 | 8.848847151  | 8.496105075  | 9.078570008  |
| Fe                 | 10.284793377 | 9.314289689  | 10.854771137 |
| Nb                 | 11.701678038 | 10.054486990 | 12.879936695 |
| N                  | 10.783138275 | 8.762173653  | 14.154298306 |
| H                  | 10.712575912 | 8.405358791  | 15.110974312 |

---

---

| vibration frequencies of NH* |                            |
|------------------------------|----------------------------|
| mode                         | frequency/cm <sup>-1</sup> |
| 1                            | 3417.62                    |
| 2                            | 627.77                     |
| 3                            | 601.36                     |
| 4                            | 561.14                     |
| 5                            | 319.70                     |
| 6                            | 243.09                     |

---



| coordinates of NH <sup>+</sup> +H <sup>*</sup> |              |              |              |
|------------------------------------------------|--------------|--------------|--------------|
| Fe                                             | 9.238486290  | 9.149045944  | 12.985500097 |
| Fe                                             | 11.035743952 | 7.503500581  | 12.517753839 |
| Fe                                             | 12.575353384 | 8.854646087  | 11.002073288 |
| Fe                                             | 11.809459925 | 11.082930565 | 10.172861814 |
| Fe                                             | 9.969788194  | 11.546943188 | 11.713385582 |
| Fe                                             | 11.072579622 | 9.213812351  | 8.702954054  |
| Fe                                             | 10.831747055 | 7.152751684  | 10.123442411 |
| Fe                                             | 8.797490001  | 7.456246614  | 11.322388649 |
| Fe                                             | 8.051391244  | 10.043859482 | 10.849748850 |
| Fe                                             | 9.531773925  | 11.041611433 | 9.234969616  |
| Fe                                             | 8.815076947  | 8.547835350  | 9.156530499  |
| Fe                                             | 10.292702913 | 9.358739853  | 10.902602673 |
| Nb                                             | 11.540249586 | 10.168048143 | 12.941319942 |
| N                                              | 10.802911520 | 8.676397800  | 14.126137495 |
| H                                              | 10.857796669 | 8.290659189  | 15.072653294 |
| H                                              | 11.086251736 | 12.122972012 | 12.885679007 |

| vibration frequencies of NH <sup>+</sup> +H <sup>*</sup> |                            |
|----------------------------------------------------------|----------------------------|
| mode                                                     | frequency/cm <sup>-1</sup> |
| 1                                                        | 3422.24                    |
| 2                                                        | 1330.79                    |
| 3                                                        | 954.17                     |
| 4                                                        | 609.89                     |
| 5                                                        | 587.06                     |
| 6                                                        | 553.11                     |
| 7                                                        | 362.42                     |
| 8                                                        | 335.36                     |
| 9                                                        | 273.22                     |

| coordinates of NH <sub>2</sub> <sup>*</sup> |              |              |              |
|---------------------------------------------|--------------|--------------|--------------|
| Fe                                          | 9.551665187  | 9.003503323  | 13.071614504 |
| Fe                                          | 11.124153137 | 7.368865013  | 12.015364170 |
| Fe                                          | 12.613296509 | 8.932862878  | 10.768542290 |
| Fe                                          | 11.811347008 | 11.200211048 | 10.352402925 |
| Fe                                          | 9.993079901  | 11.453042030 | 11.860209703 |
| Fe                                          | 11.148903370 | 9.375971556  | 8.686563373  |
| Fe                                          | 10.648587942 | 7.203805447  | 9.637064934  |
| Fe                                          | 8.772684932  | 7.362595797  | 11.308708191 |
| Fe                                          | 8.046067357  | 9.712932706  | 11.014623642 |
| Fe                                          | 9.493125677  | 10.971814394 | 9.446669221  |
| Fe                                          | 8.757144213  | 8.515036106  | 9.086564779  |
| Fe                                          | 10.304964781 | 9.254595637  | 10.863461494 |
| Nb                                          | 11.662863493 | 10.040501356 | 12.890108824 |
| N                                           | 10.671701431 | 9.384911656  | 14.734247923 |
| H                                           | 10.283796787 | 10.054339170 | 15.403892994 |
| H                                           | 10.964021683 | 8.556212783  | 15.256962776 |

| vibration frequencies of NH <sub>2</sub> <sup>*</sup> |                            |
|-------------------------------------------------------|----------------------------|
| mode                                                  | frequency/cm <sup>-1</sup> |
| 1                                                     | 3482.01                    |
| 2                                                     | 3390.85                    |
| 3                                                     | 1494.48                    |
| 4                                                     | 657.54                     |
| 5                                                     | 638.81                     |
| 6                                                     | 543.10                     |
| 7                                                     | 469.72                     |
| 8                                                     | 248.47                     |
| 9                                                     | 113.90                     |

| coordinates of NH <sub>2</sub> *+H* |              |              |              |
|-------------------------------------|--------------|--------------|--------------|
| Fe                                  | 9.578164816  | 8.836210966  | 13.086920977 |
| Fe                                  | 11.330283880 | 7.389655113  | 12.065423727 |
| Fe                                  | 12.682286501 | 8.906319141  | 10.831816196 |
| Fe                                  | 11.821331978 | 11.074632406 | 10.238819122 |
| Fe                                  | 10.020973682 | 11.392295361 | 11.828036308 |
| Fe                                  | 11.018441916 | 9.384017587  | 8.636022806  |
| Fe                                  | 10.691593885 | 7.247210741  | 9.796764255  |
| Fe                                  | 8.803550601  | 7.424831986  | 11.284629107 |
| Fe                                  | 8.059363961  | 9.866502285  | 11.061837673 |
| Fe                                  | 9.438200593  | 11.009110212 | 9.341509938  |
| Fe                                  | 8.679898381  | 8.642922044  | 9.147880673  |
| Fe                                  | 10.311571360 | 9.296345711  | 10.885620117 |
| Nb                                  | 11.613838673 | 10.051723719 | 12.933734655 |
| N                                   | 10.638265610 | 9.289044738  | 14.752627611 |
| H                                   | 10.200583935 | 9.931604862  | 15.417033434 |
| H                                   | 10.998055935 | 8.491309881  | 15.280154943 |
| H                                   | 10.915596485 | 11.954263449 | 13.151770830 |

| vibration frequencies of NH <sub>2</sub> *+H* |                            |
|-----------------------------------------------|----------------------------|
| mode                                          | frequency/cm <sup>-1</sup> |
| 1                                             | 3490.06                    |
| 2                                             | 3400.75                    |
| 3                                             | 1498.76                    |
| 4                                             | 1389.36                    |
| 5                                             | 873.71                     |
| 6                                             | 658.52                     |
| 7                                             | 645.84                     |
| 8                                             | 564.61                     |
| 9                                             | 473.46                     |
| 10                                            | 380.28                     |
| 11                                            | 257.20                     |
| 12                                            | 121.12                     |

| coordinates of NH <sub>3</sub> * |               |              |              |
|----------------------------------|---------------|--------------|--------------|
| Fe                               | 9.358091950   | 9.339267015  | 13.032523394 |
| Fe                               | 11.040483713  | 7.735847831  | 12.489039898 |
| Fe                               | 12.6017111750 | 9.020767808  | 10.931316614 |
| Fe                               | 11.755794287  | 11.195081472 | 10.202869177 |
| Fe                               | 9.921783805   | 11.517606974 | 11.672681570 |
| Fe                               | 11.111449003  | 9.258187413  | 8.642084002  |
| Fe                               | 10.660030842  | 7.177462578  | 10.015711784 |
| Fe                               | 8.761427999   | 7.522280812  | 11.470807791 |
| Fe                               | 7.983268499   | 9.779170156  | 10.815607309 |
| Fe                               | 9.478109479   | 10.893348455 | 9.193776846  |
| Fe                               | 8.814994097   | 8.418127894  | 9.074957967  |
| Fe                               | 10.290806293  | 9.330106378  | 10.837945938 |
| Nb                               | 11.791733503  | 10.294380188 | 12.777251005 |
| N                                | 13.206602335  | 11.154515743 | 14.440684319 |
| H                                | 12.913050652  | 12.080441713 | 14.764541388 |
| H                                | 14.158877134  | 11.237419844 | 14.071905613 |
| H                                | 13.244184256  | 10.535788536 | 15.256494284 |

| vibration frequencies of NH <sub>3</sub> * |                            |
|--------------------------------------------|----------------------------|
| mode                                       | frequency/cm <sup>-1</sup> |
| 1                                          | 3487.57                    |
| 2                                          | 3482.17                    |
| 3                                          | 3357.21                    |
| 4                                          | 1601.34                    |
| 5                                          | 1595.37                    |
| 6                                          | 1148.56                    |
| 7                                          | 491.38                     |
| 8                                          | 479.44                     |
| 9                                          | 300.39                     |
| 10                                         | 89.90                      |
| 11                                         | 78.74                      |
| 12                                         | 48.89                      |

---

| coordinates of N <sub>2</sub> (t)* |              |              |              |
|------------------------------------|--------------|--------------|--------------|
| Fe                                 | 9.445400238  | 9.437000155  | 13.100199699 |
| Fe                                 | 11.446800232 | 7.907400131  | 12.430399656 |
| Fe                                 | 12.747800350 | 9.005600214  | 10.640000105 |
| Fe                                 | 11.624000072 | 11.228200197 | 10.266200304 |
| Fe                                 | 9.584599733  | 11.497999430 | 11.715400219 |
| Fe                                 | 11.682000160 | 10.254000425 | 12.690800428 |
| Fe                                 | 11.262199879 | 9.339600205  | 8.614199758  |
| Fe                                 | 11.132600307 | 7.297000289  | 9.962400198  |
| Fe                                 | 9.117000103  | 7.547600269  | 11.464999914 |
| Fe                                 | 7.982000113  | 9.753400087  | 11.071799994 |
| Fe                                 | 9.286000133  | 10.883200169 | 9.288600087  |
| Fe                                 | 9.042800069  | 8.513799906  | 9.103999734  |
| Fe                                 | 10.382200480 | 9.406599998  | 10.880399942 |
| N                                  | 12.913000584 | 11.219600439 | 13.687599897 |
| N                                  | 13.652600050 | 11.807800531 | 14.323999882 |

---

---

| vibration frequencies of N <sub>2</sub> (t)* |                            |
|----------------------------------------------|----------------------------|
| mode                                         | frequency/cm <sup>-1</sup> |
| 1                                            | 2117.95                    |
| 2                                            | 323.94                     |
| 3                                            | 312.73                     |
| 4                                            | 280.51                     |
| 5                                            | 46.20                      |
| 6                                            | 36.20                      |

---
